# Supplementary material for: Ruthenium complexes with N-functionalized secondary amino ligands: a new class of catalysts toward efficient hydrogenation of esters
Source: Royal Society of Chemistry journal article supplement (doi:10.1039/c8dt04957b), 2019-01-01
Supplement: c8dt04957b1.pdf [file c8dt04957b1.pdf]

## Electronic Supplementary Information

# Ruthenium Complexes with *N*-Functionalized Secondary Amino Ligands: A New Class of Catalysts toward Efficient Hydrogenation of Esters

### Contents

|                                                              |           |
|--------------------------------------------------------------|-----------|
| <b>I. General information</b>                                | <b>2</b>  |
| <b>II. General procedure for the catalytic hydrogenation</b> | <b>3</b>  |
| <b>III. Synthetic details</b>                                | <b>4</b>  |
| <b>IV. X-ray crystallographic analysis</b>                   | <b>11</b> |
| <b>V. Activity tests</b>                                     | <b>15</b> |
| <b>VI. NMR spectra</b>                                       | <b>18</b> |
| <b>VII. References</b>                                       | <b>32</b> |

## I. General information

Unless otherwise stated, all manipulations were carried out under a dry Ar or N<sub>2</sub> atmosphere by using Schlenk line and glovebox techniques. Organic solvents as toluene, *n*-hexane, diethyl ether and tetrahydrofuran (THF) were dried by refluxing with sodium/potassium benzophenone under N<sub>2</sub> prior to use. 1,4-Dioxane was distilled from CaH<sub>2</sub> and kept in the glovebox for use. Ligands as (CH<sub>2</sub>NH<sub>2</sub>)<sub>2</sub>, (CH<sub>2</sub>NHMe)<sub>2</sub>, (CH<sub>2</sub>NHEt)<sub>2</sub>, and (CH<sub>2</sub>NH*i*Pr)<sub>2</sub> were purchased from J&K Chemical Co. and used as received. Compounds *o*-PPh<sub>2</sub>C<sub>6</sub>H<sub>4</sub>NH<sub>2</sub>,<sup>[1]</sup> *o*-PPh<sub>2</sub>C<sub>6</sub>H<sub>4</sub>NHMe,<sup>[2]</sup> *o*-PPh<sub>2</sub>C<sub>6</sub>H<sub>4</sub>NEt,<sup>[3]</sup> *o*-PPh<sub>2</sub>C<sub>6</sub>H<sub>4</sub>NHCH<sub>2</sub>Ph,<sup>[4]</sup> and RuCl<sub>2</sub>(PPh<sub>3</sub>)<sub>3</sub><sup>[5]</sup> were prepared according to procedure reported in literatures. <sup>1</sup>H (500 MHz), <sup>13</sup>C{<sup>1</sup>H} (125 MHz), and <sup>31</sup>P{<sup>1</sup>H} (202 MHz) NMR spectra were measured on a Bruker AVIII-500 spectrometer. Solid state <sup>31</sup>P (162 MHz) NMR spectra were measured on a Bruker AVIII SS-400 spectrometer. Infrared (IR) spectra were recorded using a Nicolet FT-IR 330 spectrometer. Elemental analysis was performed on a Thermo Quest Italia SPA EA 1110 instrument.

## II. General procedure for the catalytic hydrogenation

In a glovebox, ruthenium complex, THF solvent, ester substrate, and NaOMe were charged into a 100 mL Teflon-lined Parr stainless-steel reactor equipped with a stirrer bar. The autoclave was carefully pressurization/venting with H<sub>2</sub> (10 bar) for three times. Then, the autoclave was pressurized with H<sub>2</sub> (50 bar) and heated at 100 °C for 1 h. Afterwards, the autoclave was quickly cooled to ca. 5 °C and depressurized slowly. The mixture was analyzed by gas chromatograph (GC, FULI company, 9790II) equipped with a KB-Wax column (60 m × 0.32 mm × 0.33 μm) after purification through a short, silica-filled column. The conversion of ester and the yield of alcohol were calculated by using *p*-xylene as an internal standard.

### III. Synthetic details

**Synthesis of (*o*-PPh<sub>2</sub>C<sub>6</sub>H<sub>4</sub>NHMe)<sub>2</sub>RuCl<sub>2</sub> (**3**)** A mixture of (Ph<sub>3</sub>P)<sub>3</sub>RuCl<sub>2</sub> (0.48 g, 0.5 mmol) and *o*-PPh<sub>2</sub>C<sub>6</sub>H<sub>4</sub>NHMe (0.29 g, 1.0 mmol) in toluene (40 mL) was allowed to heat to 100 °C and stayed at this temperature for 48 h. During the reaction, an orange solid was gradually formed. After the reaction and cooling to room temperature, the orange solid of compound **3** was collected by filtration and washed with *n*-hexane (2 mL). Yield: 0.34 g, 90%.

<sup>1</sup>H NMR (500 MHz, CDCl<sub>3</sub>, 298 K, ppm): δ = 3.15 (d, *J*<sub>HH</sub> = 5.0 Hz, CH<sub>3</sub>), 3.21 (d, *J*<sub>HH</sub> = 5.0 Hz, CH<sub>3</sub>), 5.73 (br, NH), 5.94 (br, NH), 6.99-7.04 (m), 7.07 (t, *J*<sub>HH</sub> = 7.5 Hz), 7.10 (s), 7.13 (t, *J*<sub>HH</sub> = 7.5 Hz), 7.17 (br), 7.18 (s), 7.20 (s), 7.22-7.36 (m) (C<sub>6</sub>H<sub>4</sub> and Ph).

<sup>13</sup>C{<sup>1</sup>H} NMR (125 MHz, CDCl<sub>3</sub>, 298 K, ppm): δ = 39.85 (s, CH<sub>3</sub>), 41.04 (s, CH<sub>3</sub>), 123.10 (t, *J*<sub>PC</sub> = 5.0 Hz), 124.46 (t, *J*<sub>PC</sub> = 5.0 Hz), 125.79 (s), 126.51 (s), 127.13 (t, *J*<sub>PC</sub> = 5.0 Hz), 127.23 (d, *J*<sub>PC</sub> = 3.1 Hz), 127.30 (t, *J*<sub>PC</sub> = 5.0 Hz), 128.86 (d, *J*<sub>PC</sub> = 8.1 Hz), 129.10 (d, *J*<sub>PC</sub> = 11.2 Hz), 130.64 (s), 130.77 (s), 132.96 (s), 133.60 (s), 133.84 (t, *J*<sub>PC</sub> = 5.0 Hz), 133.98 (t, *J*<sub>PC</sub> = 2.5 Hz), 134.30 (t, *J*<sub>PC</sub> = 5.0 Hz), 155.30 (t, *J*<sub>PC</sub> = 6.3 Hz) (C<sub>6</sub>H<sub>4</sub> and Ph).

<sup>31</sup>P{<sup>1</sup>H} NMR (202 MHz, CDCl<sub>3</sub>, 298 K, ppm): δ = 57.61 (s), 61.86 (s).

<sup>31</sup>P NMR (162 MHz, in solid, 298 K, ppm): δ = 58.04 (br).

IR (Nujol mull, KBr, cm<sup>-1</sup>): ν = 3181, 3245 (N–H).

Anal. Calcd (%) for RuCl<sub>2</sub>C<sub>38</sub>H<sub>36</sub>N<sub>2</sub>P<sub>2</sub> (*M*<sub>r</sub> = 754.6): C 60.48, N 3.71, H 4.81; found: C 59.94, N 3.63, H 4.99.

**Synthesis of (*o*-PPh<sub>2</sub>C<sub>6</sub>H<sub>4</sub>NHEt)<sub>2</sub>RuCl<sub>2</sub> (**4**)** A mixture of (Ph<sub>3</sub>P)<sub>3</sub>RuCl<sub>2</sub> (0.29 g, 0.3 mmol) and *o*-PPh<sub>2</sub>C<sub>6</sub>H<sub>4</sub>NHEt (0.18 g, 0.6 mmol) in toluene (40 mL) was allowed to heat to 65 °C and stayed at this temperature for 4 d. The solution color change from green to brown was observed. After the reaction, the solution was cooled to room temperature. After concentration to ca. 1 mL, addition of *n*-hexane (5 mL) led to precipitation of the light-orange solid from the solution. The solid was collected by filtration and was subject to recrystallization in a THF/*n*-hexane (1 mL/5 mL) solvent mixture at –20 °C. After 3 d, the pure crystalline solid of compound **4** was formed, which was collected by filtration and dried *in vacuo*. Yield: 0.16 g, 68%.

<sup>1</sup>H NMR plus <sup>1</sup>H-<sup>13</sup>C HSQC (500 MHz, CDCl<sub>3</sub>, 298 K, ppm): δ = 1.13 (t, *J*<sub>HH</sub> = 5.0 Hz, CH<sub>3</sub>), 1.29 (t, *J*<sub>HH</sub> = 5.0 Hz, CH<sub>3</sub>), 3.36 (br, CH<sub>2</sub>), 3.47 (br, CH<sub>2</sub>), 3.78 (br, CH<sub>2</sub>), 5.72 (br, NH), 5.83 (br, NH), 6.78 (br), 6.98-7.34 (m), 7.41 (d, *J*<sub>HH</sub> = 5.0 Hz), 7.44 (t, *J*<sub>HH</sub> = 5.0 Hz), 7.55 (d, *J*<sub>HH</sub> = 5.0 Hz), 7.65 (d, *J*<sub>HH</sub> = 5.0 Hz) (C<sub>6</sub>H<sub>4</sub> and Ph).

<sup>13</sup>C{<sup>1</sup>H} NMR (125 MHz, CDCl<sub>3</sub>, 298 K, ppm): δ = 14.69 (s, CH<sub>3</sub>), 15.07 (s, CH<sub>3</sub>), 46.89 (s, CH<sub>2</sub>), 48.92 (s, CH<sub>2</sub>), 123.87 (s), 125.23 (s), 125.30 (s), 126.13 (s), 127.00 (s), 127.25 (s), 128.22 (s), 128.83 (s), 129.02 (d, *J*<sub>PC</sub> = 1.9 Hz), 130.14 (s), 130.36 (s), 133.82 (d, *J*<sub>PC</sub> = 25.0 Hz), 134.04 (d, *J*<sub>PC</sub> = 30.0 Hz), 134.34 (s), 154.25 (s) (C<sub>6</sub>H<sub>4</sub> and Ph).

<sup>31</sup>P{<sup>1</sup>H} NMR (202 MHz, CDCl<sub>3</sub>, 298 K, ppm): δ = 56.67 (s), 60.03 (s).

<sup>31</sup>P NMR (162 MHz, in solid, 298 K, ppm): δ = 61.61 (br).

IR (Nujol mull, KBr, cm<sup>-1</sup>): ν = 3240 (N–H).

Anal. Calcd (%) for RuCl<sub>2</sub>C<sub>40</sub>H<sub>40</sub>N<sub>2</sub>P<sub>2</sub> (*M*<sub>r</sub> = 782.7): C 61.38, N 3.58, H 5.15; found: C 60.29, N 3.23, H 5.25.

**Synthesis of (*o*-PPh<sub>2</sub>C<sub>6</sub>H<sub>4</sub>NHCH<sub>2</sub>Ph)<sub>2</sub>RuCl<sub>2</sub> (**5**)** A mixture of (Ph<sub>3</sub>P)<sub>3</sub>RuCl<sub>2</sub> (0.29 g, 0.3 mmol) and *o*-PPh<sub>2</sub>C<sub>6</sub>H<sub>4</sub>NHCH<sub>2</sub>Ph (0.22 g, 0.6 mmol) in toluene (40 mL) was allowed to heat at 100 °C for 48 h. After the reaction a yellow solution was developed. The solution was cooled to room temperature and then concentrated to ca. 1 mL. Addition of *n*-hexane (5 mL) led to precipitation of the brick-red solid from the solution. The solid was collected by filtration and was subject to recrystallization in a THF/*n*-hexane (1 mL/5 mL) solvent mixture at –20 °C. After 3 d, the pure crystalline solid of compound **5** was obtained, which was collected by filtration and dried *in vacuo*. Yield: 0.25 g, 93%.

<sup>1</sup>H NMR plus <sup>1</sup>H-<sup>13</sup>C HSQC (500 MHz, CDCl<sub>3</sub>, 298 K, ppm): δ = 3.86 (dd, *J*<sub>HH</sub> = 5.0, 15.0 Hz, CH<sub>2</sub>), 4.21 (dd, *J*<sub>HH</sub> = 10.0, 15.0 Hz, CH<sub>2</sub>), 4.93 (dd, *J*<sub>HH</sub> = 5.0, 15.0 Hz, CH<sub>2</sub>), 5.20 (d, *J*<sub>HH</sub> = 15.0 Hz, CH<sub>2</sub>), 5.70 (t, *J*<sub>HH</sub> = 5.0 Hz, NH), 6.18 (d, *J*<sub>HH</sub> = 5.0 Hz, NH), 6.89 (d, *J*<sub>HH</sub> = 10.0 Hz), 7.08 (t, *J*<sub>HH</sub> = 10.0 Hz), 7.11-7.36 (m), 7.61 (d, *J*<sub>HH</sub> = 10.0 Hz) (C<sub>6</sub>H<sub>4</sub> and Ph).

<sup>13</sup>C{<sup>1</sup>H} NMR (125 MHz, CDCl<sub>3</sub>, 298 K, ppm): δ = 58.33 (s, CH<sub>2</sub>), 59.60 (s, CH<sub>2</sub>), 125.53 (d, *J*<sub>PC</sub> = 7.5 Hz), 125.96 (s), 127.13 (t, *J*<sub>PC</sub> = 5.0 Hz), 127.26 (t, *J*<sub>PC</sub> = 5.0 Hz), 127.71 (s), 128.02 (s), 128.74 (s), 129.01 (d, *J*<sub>PC</sub> = 13.8 Hz), 129.72 (s), 129.90 (s), 133.10 (s), 133.39 (s), 134.15 (d, *J*<sub>PC</sub> = 10.0 Hz), 138.50 (s), 155.11 (t, *J*<sub>PC</sub> = 7.5 Hz) (C<sub>6</sub>H<sub>4</sub> and Ph).

<sup>31</sup>P{<sup>1</sup>H} NMR (202 MHz, CDCl<sub>3</sub>, 298 K, ppm): δ = 57.66 (s), 59.30 (s).

<sup>31</sup>P NMR (162 MHz, in solid, 298 K, ppm): δ = 57.59 (br).

IR (Nujol mull, KBr, cm<sup>-1</sup>): ν = 3128, 3192 (N–H).

Anal. Calcd (%) for RuCl<sub>2</sub>C<sub>50</sub>H<sub>44</sub>N<sub>2</sub>P<sub>2</sub> (*M*<sub>r</sub> = 906.8): C 66.22, N 3.09, H 4.89; found: C 66.30, N 2.85, H 5.08.

**Synthesis of (*o*-PPh<sub>2</sub>C<sub>6</sub>H<sub>4</sub>NH<sub>2</sub>)[NH<sub>2</sub>(CH<sub>2</sub>)<sub>2</sub>NH<sub>2</sub>]RuCl<sub>2</sub> (6)** A mixture of [(Ph<sub>3</sub>P)(*o*-PPh<sub>2</sub>C<sub>6</sub>H<sub>4</sub>NH<sub>2</sub>)RuCl<sub>2</sub>]<sub>2</sub> (**1**, 0.28 g, 0.2 mmol) and (CH<sub>2</sub>NH<sub>2</sub>)<sub>2</sub> (24.1 mg, 0.4 mmol) in toluene (30 mL) was well-sealed in a high pressure bottle and heated at 130 °C for 4 d. After cooling to room temperature, the light yellow-green solid of compound **6** was formed, which was collected by filtration and washed with *n*-hexane (2 mL). Yield: 0.18 g, 88%. During to insolubility in organic solvent, the solid state <sup>31</sup>P NMR and IR spectra were recorded.

<sup>31</sup>P NMR (162 MHz, in solid, 298 K, ppm):  $\delta = 69.41$  (br).

IR (Nujol mull, KBr, cm<sup>-1</sup>):  $\nu = 3071, 3125, 3209, 3287$  (N-H).

Anal. Calcd (%) for RuCl<sub>2</sub>C<sub>20</sub>H<sub>24</sub>N<sub>3</sub>P ( $M_r = 509.1$ ): C 47.18, N 8.26, H 4.75; found: C 47.42, N 7.88, H 4.56.

**Synthesis of (*o*-PPh<sub>2</sub>C<sub>6</sub>H<sub>4</sub>NH<sub>2</sub>)[MeNH(CH<sub>2</sub>)<sub>2</sub>NHMe]RuCl<sub>2</sub> (7)** A mixture of [(Ph<sub>3</sub>P)(*o*-PPh<sub>2</sub>C<sub>6</sub>H<sub>4</sub>NH<sub>2</sub>)RuCl<sub>2</sub>]<sub>2</sub> (**1**, 0.28 g, 0.2 mmol) and (CH<sub>2</sub>NHMe)<sub>2</sub> (35.3 mg, 0.4 mmol) in THF (30 mL) was heated at 60 °C for 48 h. After the reaction, a yellow solution was developed. The solution was cooled to room temperature and then concentrated to ca. 1 mL. Addition of *n*-hexane (5 mL) led to precipitation of the light-yellow solid from the solution. The solid was collected by filtration and was subject to recrystallization in a THF/*n*-hexane (1 mL/5 mL) solvent mixture at 20 °C. After 4 d, the pure crystalline solid of compound **7** was obtained, which was collected by filtration and dried *in vacuo*. Yield: 96.7 mg, 45%.

<sup>1</sup>H NMR plus <sup>1</sup>H-<sup>13</sup>C HSQC (500 MHz, CDCl<sub>3</sub>, 298 K, ppm): δ = 1.27 (d, *J*<sub>HH</sub> = 20.0 Hz, 1 H, NH), 1.59 (dd, *J*<sub>HH</sub> = 10.0, 20.0 Hz, 1 H, CH<sub>2</sub>), 1.90 (d, *J*<sub>HH</sub> = 10.0 Hz, 1 H, CH<sub>2</sub>), 2.16 (d, *J*<sub>HH</sub> = 10.0 Hz, 3 H, CH<sub>3</sub>), 2.82 (d, *J*<sub>HH</sub> = 5.0 Hz, 3 H, CH<sub>3</sub>), 2.84 (d, *J*<sub>HH</sub> = 15.0 Hz, 1 H, CH<sub>2</sub>), 3.16 (dd, *J*<sub>HH</sub> = 10.0, 20.0 Hz, 1 H, CH<sub>2</sub>), 4.65 (br, 1 H, NH), 4.92 (d, *J*<sub>HH</sub> = 10.0 Hz, 1 H, NH), 5.74 (d, *J*<sub>HH</sub> = 15.0 Hz, 1 H, NH), 7.04 (t, *J*<sub>HH</sub> = 10.0 Hz), 7.23 (d, *J*<sub>HH</sub> = 5.0 Hz), 7.34 (t, *J*<sub>HH</sub> = 10.0 Hz), 7.40 (br), 7.43 (d, *J*<sub>HH</sub> = 5.0 Hz), 7.63 (d, *J*<sub>HH</sub> = 10.0 Hz), 8.51 (t, *J*<sub>HH</sub> = 10.0 Hz) (14 H, C<sub>6</sub>H<sub>4</sub> and Ph).

<sup>13</sup>C{<sup>1</sup>H} NMR (125 MHz, CDCl<sub>3</sub>, 298 K, ppm): δ = 40.07 (s, 1 C, CH<sub>3</sub>), 46.11 (s, 1 C, CH<sub>3</sub>), 53.81 (s, 1 C, CH<sub>2</sub>), 56.52 (s, 1 C, CH<sub>2</sub>), 125.91 (d, *J*<sub>PC</sub> = 10.0 Hz), 127.54 (d, *J*<sub>PC</sub> = 5.0 Hz), 128.06 (d, *J*<sub>PC</sub> = 8.8 Hz), 128.21 (s), 128.96 (s), 129.02 (s), 129.65 (s), 130.38 (d, *J*<sub>PC</sub> = 18.8 Hz), 131.30 (s), 131.37 (s), 134.07 (d, *J*<sub>PC</sub> = 37.5 Hz), 135.65 (d, *J*<sub>PC</sub> = 11.3 Hz), 136.92 (d, *J*<sub>PC</sub> = 5.0 Hz), 137.24 (s) 149.67 (d, *J*<sub>PC</sub> = 18.8 Hz) (18 C, C<sub>6</sub>H<sub>4</sub> and Ph).

<sup>31</sup>P{<sup>1</sup>H} NMR (202 MHz, CDCl<sub>3</sub>, 298 K, ppm): δ = 71.35 (s).

IR (Nujol mull, KBr, cm<sup>-1</sup>): ν = 3146, 3158, 3204, 3267 (N-H).

Anal. Calcd (%) for RuCl<sub>2</sub>C<sub>22</sub>H<sub>28</sub>N<sub>3</sub>P (*M*<sub>r</sub> = 537.4): C 49.17, N 7.82, H 5.25; found: C 50.34, N 7.49, H 5.44.



**Synthesis of (*o*-PPh<sub>2</sub>C<sub>6</sub>H<sub>4</sub>NH<sub>2</sub>)[EtNH(CH<sub>2</sub>)<sub>2</sub>NHEt]RuCl<sub>2</sub> (**8**)** A mixture of [(Ph<sub>3</sub>P)(*o*-PPh<sub>2</sub>C<sub>6</sub>H<sub>4</sub>NH<sub>2</sub>)RuCl<sub>2</sub>]<sub>2</sub> (**1**, 0.28 g, 0.2 mmol) and (CH<sub>2</sub>NHEt)<sub>2</sub> (46.5 mg, 0.4 mmol) in toluene (30 mL) was heated at 100 °C for 48 h. After the reaction a light-yellow solution was developed. The solution was slowly cooled to room temperature, and the crystalline solid of compound **8** was collected by filtration and dried *in vacuo*. Yield: 0.19 g, 83%.

<sup>1</sup>H NMR plus <sup>1</sup>H-<sup>13</sup>C HSQC (500 MHz, CDCl<sub>3</sub>, 298 K, ppm): δ = 0.51 (t, *J*<sub>HH</sub> = 7.0 Hz, 3 H, CH<sub>3</sub>), 1.02 (t, *J*<sub>HH</sub> = 7.0 Hz, 1 H, NH), 1.11 (t, *J*<sub>HH</sub> = 7.0 Hz, 3 H, CH<sub>3</sub>), 1.45 (m, 1H, CH<sub>2</sub>), 1.98 (m, 1 H, CH<sub>2</sub>), 2.17 (d, *J*<sub>HH</sub> = 11.0 Hz, 1 H, CH<sub>2</sub>), 2.36 (m, 1 H, CH<sub>2</sub>), 3.01 (m, 1 H, CH<sub>2</sub>), 3.07-3.18 (m, 2 H, CH<sub>2</sub>), 3.98 (m, 1 H, CH<sub>2</sub>), 4.31 (t, *J*<sub>HH</sub> = 8.5 Hz, 1 H, NH), 4.75 (t, *J*<sub>HH</sub> = 13.0 Hz, 1 H, NH), 5.74 (t, *J*<sub>HH</sub> = 15.0 Hz, 1 H, NH), 7.04 (t, *J*<sub>HH</sub> = 8.5 Hz), 7.23 (t, *J*<sub>HH</sub> = 7.0 Hz), 7.33 (t, *J*<sub>HH</sub> = 7.5 Hz), 7.36-7.44 (m), 7.58 (m), 8.45 (t, *J*<sub>HH</sub> = 8.5 Hz) (14 H, C<sub>6</sub>H<sub>4</sub> and Ph).

<sup>13</sup>C {<sup>1</sup>H} NMR (125 MHz, CDCl<sub>3</sub>, 298 K, ppm): δ = 13.26 (s, 1 C, CH<sub>3</sub>), 14.46 (s, 1 C, CH<sub>3</sub>), 47.14 (s, 1 C, CH<sub>2</sub>), 49.23 (s, 1 C, CH<sub>2</sub>), 52.52 (s, 1 C, CH<sub>2</sub>), 53.55 (s, 1 C, CH<sub>2</sub>), 125.89 (d, *J*<sub>PC</sub> = 9.1 Hz), 127.55 (d, *J*<sub>PC</sub> = 4.5 Hz), 128.06 (d, *J*<sub>PC</sub> = 9.6 Hz), 129.03 (d, *J*<sub>PC</sub> = 8.3 Hz), 129.57 (s), 130.18 (d, *J*<sub>PC</sub> = 1.4 Hz), 130.44 (s), 131.56 (s), 131.62 (s), 134.43 (d, *J*<sub>PC</sub> = 37.0 Hz), 135.47 (d, *J*<sub>PC</sub> = 10.0 Hz), 137.09 (d, *J*<sub>PC</sub> = 11.8 Hz), 137.11 (d, *J*<sub>PC</sub> = 67.8 Hz), 149.34 (d, *J*<sub>PC</sub> = 18.1 Hz) (18 C, C<sub>6</sub>H<sub>4</sub> and Ph).

<sup>31</sup>P {<sup>1</sup>H} NMR (202 MHz, CDCl<sub>3</sub>, 298 K, ppm): δ = 70.75 (s).

IR (Nujol mull, KBr, cm<sup>-1</sup>): ν = 3128, 3167, 3200, 3245 (N-H).

Anal. Calcd (%) for RuCl<sub>2</sub>C<sub>24</sub>H<sub>32</sub>N<sub>3</sub>P (*M*<sub>r</sub> = 565.5): C 50.97, N 7.43, H 5.70; found: C 51.34, N 7.07, H 5.71.

**Synthesis of (*o*-PPh<sub>2</sub>C<sub>6</sub>H<sub>4</sub>NH<sub>2</sub>)[*i*PrNH(CH<sub>2</sub>)<sub>2</sub>NH*i*Pr]RuCl<sub>2</sub> (9)** A mixture of [(Ph<sub>3</sub>P)(*o*-PPh<sub>2</sub>C<sub>6</sub>H<sub>4</sub>NH<sub>2</sub>)RuCl<sub>2</sub>]<sub>2</sub> (**1**, 0.28 g, 0.2 mmol) and (CH<sub>2</sub>NH*i*Pr)<sub>2</sub> (57.7 mg, 0.4 mmol) in 1,4-dioxane (15 mL) was heated at 101 °C for 18 d. During the reaction, a light-yellow solid was gradually formed. After the reaction and cooling to room temperature, the solid of compound **9** was collected by filtration and washed with *n*-hexane (2 mL). Yield: 0.14 g, 59%.

<sup>1</sup>H NMR plus <sup>1</sup>H-<sup>13</sup>C HSQC (500 MHz, CDCl<sub>3</sub>, 298 K, ppm): δ = 0.87 (d, *J*<sub>HH</sub> = 5.0 Hz, 3 H, CH<sub>3</sub>), 0.88 (unknown, 1 H, NH), 1.10 (d, *J*<sub>HH</sub> = 10.0 Hz, 3 H, CH<sub>3</sub>), 1.49 (dd, *J*<sub>HH</sub> = 3.5, 6.5 Hz, 6 H, CH<sub>3</sub>), 2.63 (dd, *J*<sub>HH</sub> = 15.0, 25.0 Hz, 1 H, CH), 2.78 (d, *J*<sub>HH</sub> = 15.0 Hz, 1 H, CH), 3.20 (d, *J*<sub>HH</sub> = 10.0 Hz, 1 H, NH), 3.23 (s, 1 H, CH), 3.60 (m, 1 H, CH), 3.81 (m, 2 H, CH<sub>2</sub>), 4.81 (d, *J*<sub>HH</sub> = 30.0 Hz, 2 H, NH<sub>2</sub>), 7.22-7.32 (m), 7.36 (d, *J*<sub>HH</sub> = 5.0 Hz), 7.39 (s), 7.49 (t, *J*<sub>HH</sub> = 5.0 Hz), 7.73 (t, *J*<sub>HH</sub> = 5.0 Hz) (14 H, C<sub>6</sub>H<sub>4</sub> and Ph).

<sup>13</sup>C {<sup>1</sup>H} NMR (125 MHz, CDCl<sub>3</sub>, 298 K, ppm): δ = 17.83 (s, 1 C, CH), 20.93 (s, 1 C, CH<sub>2</sub>), 22.76 (s, 1 C, CH), 23.81 (s, 1 C, CH<sub>2</sub>), 41.51 (s, 1 C, CH<sub>3</sub>), 45.34 (s, 1 C, CH<sub>3</sub>), 50.81 (s, 1 C, CH<sub>3</sub>), 57.77 (s, 1 C, CH<sub>3</sub>), 127.07 (s), 127.41 (d, *J*<sub>PC</sub> = 8.8 Hz), 127.70 (d, *J*<sub>PC</sub> = 7.5 Hz), 128.82 (s), 129.32 (s), 129.88 (s), 132.30 (s), 133.60 (d, *J*<sub>PC</sub> = 8.8 Hz), 134.11 (d, *J*<sub>PC</sub> = 8.8 Hz) (18 C, C<sub>6</sub>H<sub>4</sub> and Ph).

<sup>31</sup>P {<sup>1</sup>H} NMR (202 MHz, CDCl<sub>3</sub>, 298 K, ppm): δ = 66.45 (s).

IR (Nujol mull, KBr, cm<sup>-1</sup>): ν = 3142, 3201, 3254 (N-H).

Anal. Calcd (%) for RuCl<sub>2</sub>C<sub>26</sub>H<sub>36</sub>N<sub>3</sub>P (*M*<sub>r</sub> = 593.5): C 52.61, N 7.08, H 6.11; found: C 51.36, N 7.25, H 5.98.

#### IV. X-ray crystallographic analysis

**X-ray crystallographic analysis of 3:** Crystallographic data for **3** was collected at 173 K on an Agilent Super Nova system using Cu-K $\alpha$  radiation ( $\lambda = 1.54178 \text{ \AA}$ ). Intensity measurements were performed on a rapidly cooled crystal with dimensions of  $0.10 \times 0.05 \times 0.05 \text{ mm}^3$  in the range  $4.05^\circ < \theta < 73.73^\circ$ . The data completeness collected was 96.9%. Absorption correction was applied using the spherical harmonic program (multi-scan type). The structure was solved by direct method (SHELXS-96)<sup>[6]</sup> and refined against  $F^2$  using SHELXL-97 program.<sup>[7]</sup> In general, non-hydrogen atoms were located from different Fourier synthesis and refined anisotropically, and hydrogen atoms were included using a riding mode with  $U_{\text{iso}}$  tied to the  $U_{\text{iso}}$  of the parent atom unless otherwise specified. Hydrogen atoms H(1) (at N(1)) and H(2) (at N(2)) were located from different Fourier synthesis and refined isotropically. Crystal data for **3**:  $\text{C}_{38}\text{H}_{36}\text{Cl}_2\text{N}_2\text{P}_2\text{Ru}$ ,  $M_r = 754.60$ , monoclinic, space group  $P2(1)/n$ ,  $a = 18.1403(6)$ ,  $b = 10.3239(3)$ ,  $c = 18.5086(6) \text{ \AA}$ ,  $\alpha = 90^\circ$ ,  $\beta = 106.797(3)^\circ$ ,  $\gamma = 90^\circ$ ,  $V = 3318.38(18) \text{ \AA}^3$ ,  $Z = 4$ ,  $\rho_{\text{calcd}} = 1.510 \text{ g}\cdot\text{cm}^{-3}$ ,  $\mu(\text{Cu}_{K\alpha}) = 6.452 \text{ mm}^{-1}$ ,  $F(000) = 1544$ ; 12395 measured reflections, 6494 independent ( $R_{\text{int}} = 0.0281$ ). The final refinements converged at  $R_1 = 0.0314$  and  $wR_2 = 0.0843$  for  $I > 2\sigma(I)$  and  $R_1 = 0.0330$  and  $wR_2 = 0.0857$  for all data. The goodness of fit (GOF) is 1.038. Fourier synthesis gave a min/max residual electron density  $-0.950/1.362 \text{ e \AA}^{-3}$ . CCDC-1884112 contains the supplementary crystallographic data. The data can be obtained free of charge from the Cambridge Crystallographic Data Centre via [www.ccdc.cam.ac.uk/data\\_request/cif](http://www.ccdc.cam.ac.uk/data_request/cif).

**X-ray crystallographic analysis of 8:** Crystallographic data for **8** was collected at 100 K on an Agilent Super Nova system using graphite-monochromated Mo-K $\alpha$  radiation ( $\lambda = 0.71000 \text{ \AA}$ ). Intensity measurements were performed on a rapidly cooled crystal with dimensions of  $0.04 \times 0.04 \times 0.03 \text{ mm}^3$  in the range  $1.80^\circ < \theta < 26.41^\circ$ . The data completeness collected was 96.9%. Absorption correction was applied using the spherical harmonic program (multi-scan type). The structure was solved by direct method (SHELXS-96)<sup>[6]</sup> and refined against  $F^2$  using SHELXL-97 program.<sup>[7]</sup> In general, non-hydrogen atoms were located from different Fourier synthesis and refined anisotropically, and hydrogen atoms were included using a riding mode with  $U_{\text{iso}}$  tied to the  $U_{\text{iso}}$  of the parent atom unless otherwise specified. The hydrogen atom(s) at the nitrogen atom (H(1) at the N(1) and H(3A) and H(3B) at the N(3)) were located from different Fourier synthesis and refined isotropically. The ethyl group at N(1) was disordered and treated in PART method. The final refinement gave occupations of 0.69711 and 0.30289 for C(19)C(20) and C(19A)C(20A), respectively. Similar disorder was also observed for the ethyl group at N(2) (C(23)C(24) 0.71166 and C(23A)C(24A)

0.28834). Crystal data for **8**: C<sub>24</sub>H<sub>32</sub>Cl<sub>2</sub>N<sub>3</sub>PRu,  $M_r = 565.47$ , monoclinic, space group  $P2(1)/n$ ,  $a = 12.7575(4)$ ,  $b = 11.4706(4)$ ,  $c = 16.9277(7)$  Å,  $\alpha = 90^\circ$ ,  $\beta = 104.391(4)^\circ$ ,  $\gamma = 90^\circ$ ,  $V = 2399.41(15)$  Å<sup>3</sup>,  $Z = 4$ ,  $\rho_{\text{calcd}} = 1.565$  g·cm<sup>-3</sup>,  $\mu(\text{MoK}\alpha) = 0.960$  mm<sup>-1</sup>,  $F(000) = 1160$ ; 9274 measured reflections, 4781 independent ( $R_{\text{int}} = 0.0529$ ). The final refinements converged at  $R_1 = 0.0539$  and  $wR_2 = 0.1392$  for  $I > 2\sigma(I)$  and  $R_1 = 0.0641$  and  $wR_2 = 0.1502$  for all data. The goodness of fit (GOF) is 1.035. Fourier synthesis gave a min/max residual electron density  $-1.144/1.042$  e Å<sup>3</sup>. CCDC-1884111 contains the supplementary crystallographic data. The data can be obtained free of charge from the Cambridge Crystallographic Data Centre via [www.ccdc.cam.ac.uk/data\\_request/cif](http://www.ccdc.cam.ac.uk/data_request/cif).

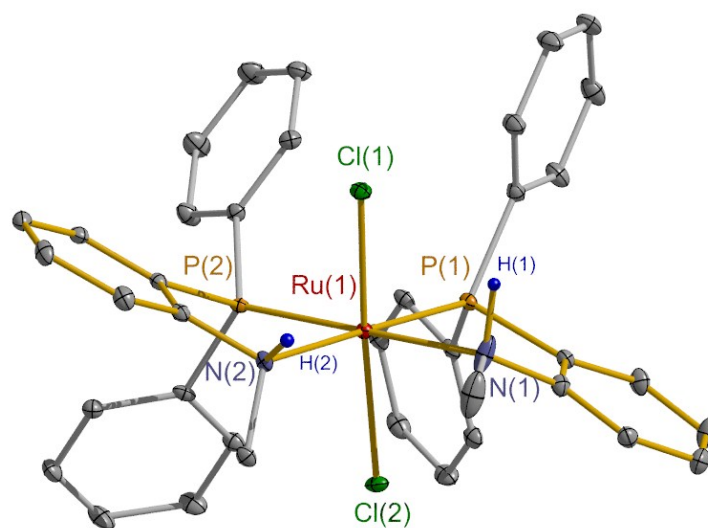

**Fig. S1** X-ray crystal structure of **3** with thermal ellipsoids at 30% probability level. Hydrogen atoms except for H(1) and H(2) are omitted for clarity. Selected bond lengths [ $\text{\AA}$ ] and angles [ $^\circ$ ] for **3**: Ru(1)–P(1) 2.2636(5), Ru(1)–P(2) 2.2411(5), Ru(1)–N(1) 2.225(2), Ru(1)–N(2) 2.2476(18), Ru(1)–Cl(1) 2.4282(5), Ru(1)–Cl(2) 2.3958(5); P(1)–Ru(1)–N(1) 80.94(6), P(2)–Ru(1)–N(2) 80.90(5).

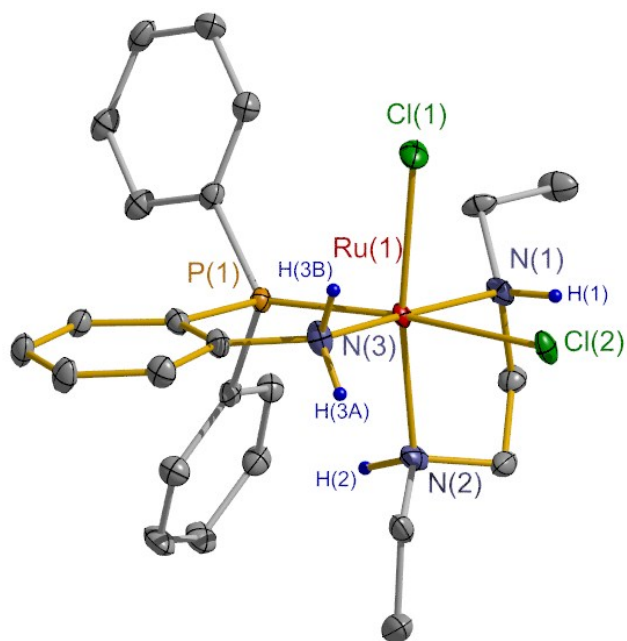

**Fig. S2** X-ray crystal structure of **8** with thermal ellipsoids at 30% probability level. Hydrogen atoms except for H(1), H(2), H(3A) and H(3B) are omitted for clarity. Selected bond lengths [ $\text{\AA}$ ] and angles [ $^\circ$ ] for **8**: Ru(1)–P(1) 2.2205(11), Ru(1)–N(1) 2.135(4), Ru(1)–N(2) 2.136(4), Ru(1)–N(3) 2.140(4), Ru(1)–Cl(1) 2.4280(13), Ru(1)–Cl(2) 2.5072(11); P(1)–Ru(1)–N(3) 83.47(11), N(1)–Ru(1)–N(2) 81.60(16).

## V. Activity tests

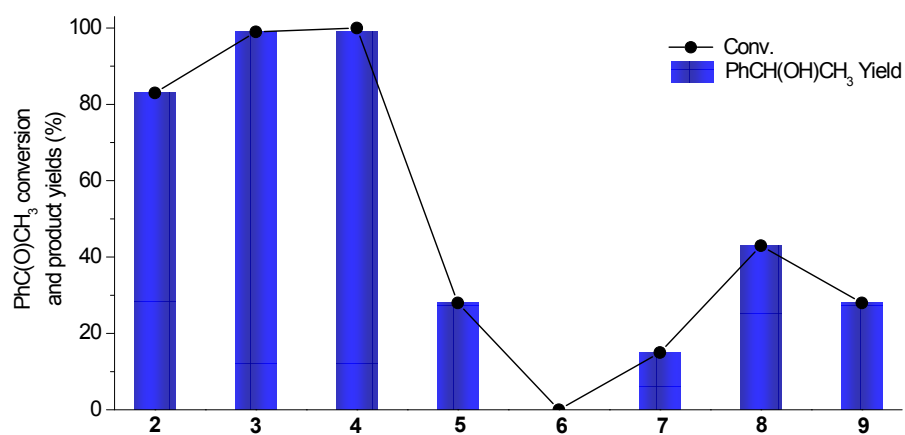

**Fig. S3** Catalytic performance of **2-9** for hydrogenation of acetophenone into 1-phenylethanol. Reaction conditions: 13.72 mmol acetophenone, 0.02 mol% ruthenium, 0.2 mol% NaOMe, 10 mL isopropanol, 10 bar H<sub>2</sub>; room temperature; 1 h reaction time. The conversion of acetophenone and yield of 1-phenylethanol were analyzed by gas chromatograph (GC) using *p*-xylene as an internal standard.

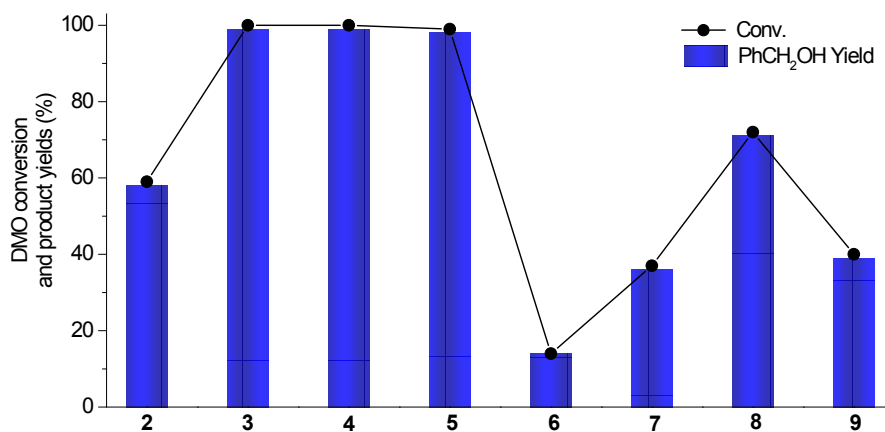

**Fig. S4** Catalytic performance of **2-9** for hydrogenation of benzaldehyde into benzyl alcohol. Reaction conditions: 13.72 mmol benzaldehyde, 0.02 mol% ruthenium, 0.2 mol% NaOMe, 10 mL isopropanol, 10 bar H<sub>2</sub>; room temperature; 1 h reaction time. The conversion of benzaldehyde and yield of benzyl alcohol were analyzed by gas chromatograph (GC) using *p*-xylene as an internal standard.



**Table S1** Hydrogenation of DMO into MG (and/or EG) catalyzed by ruthenium complexes **1-9**.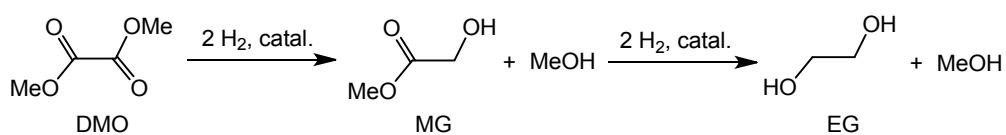

| Entry | Ru complex | Conv. (%) | Yield of MG (%) | Yield of EG (%) | TOF (h <sup>-1</sup> ) |
|-------|------------|-----------|-----------------|-----------------|------------------------|
| 1     | <b>1</b>   | 7         | 7               | 0               | 140                    |
| 2     | <b>2</b>   | 8         | 8               | 0               | 160                    |
| 3     | <b>3</b>   | 77        | 76              | 0               | 1520                   |
| 4     | <b>4</b>   | 27        | 27              | 0               | 540                    |
| 5     | <b>5</b>   | 24        | 24              | 0               | 480                    |
| 6     | <b>6</b>   | 0         | 0               | 0               | 0                      |
| 7     | <b>7</b>   | 36        | 36              | 0               | 720                    |
| 8     | <b>8</b>   | 100       | 98              | 1               | 2000                   |
| 9     | <b>9</b>   | 6         | 6               | 0               | 120                    |

Reaction conditions: 11.35 mmol DMO, 0.05 mol% ruthenium, 0.5 mol% NaOMe, 10 mL THF, 50 bar H<sub>2</sub>; 100 °C; 1 h reaction time. The conversion of DMO and yield of alcohols were determined by GC using *p*-xylene as an internal standard.

## VI. NMR spectra

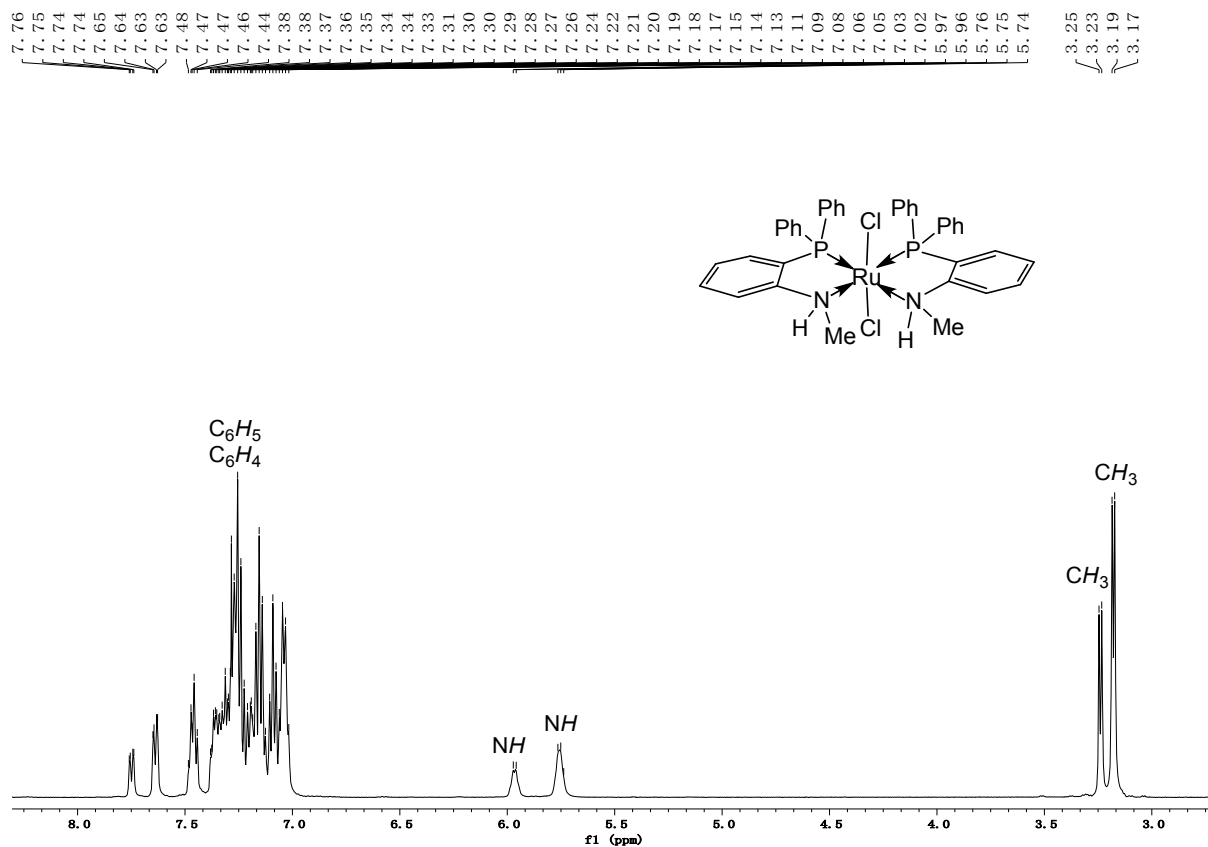

**Fig. S5**  $^1\text{H}$  NMR spectrum of **3** in  $\text{CDCl}_3$ .

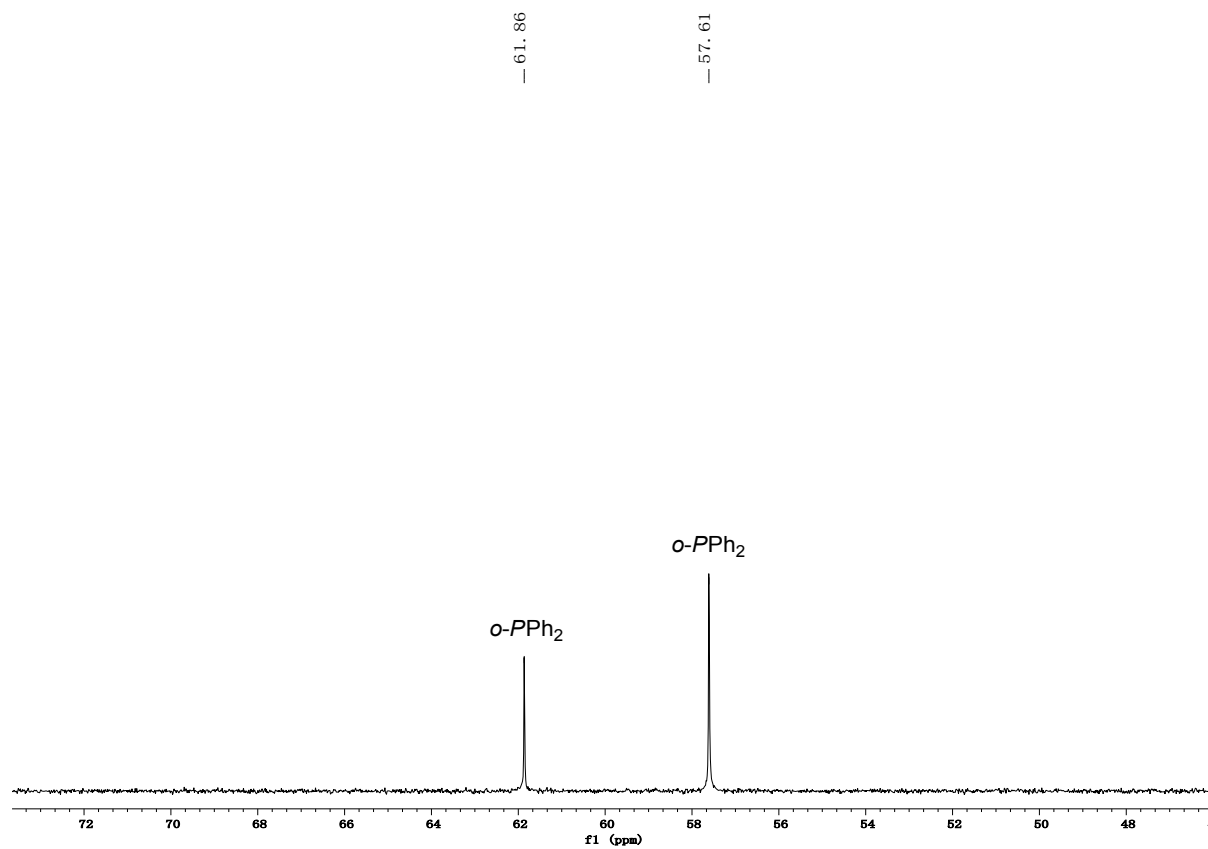

**Fig. S6**  $^{31}\text{P}\{^1\text{H}\}$  NMR spectrum of **3** in  $\text{CDCl}_3$ .

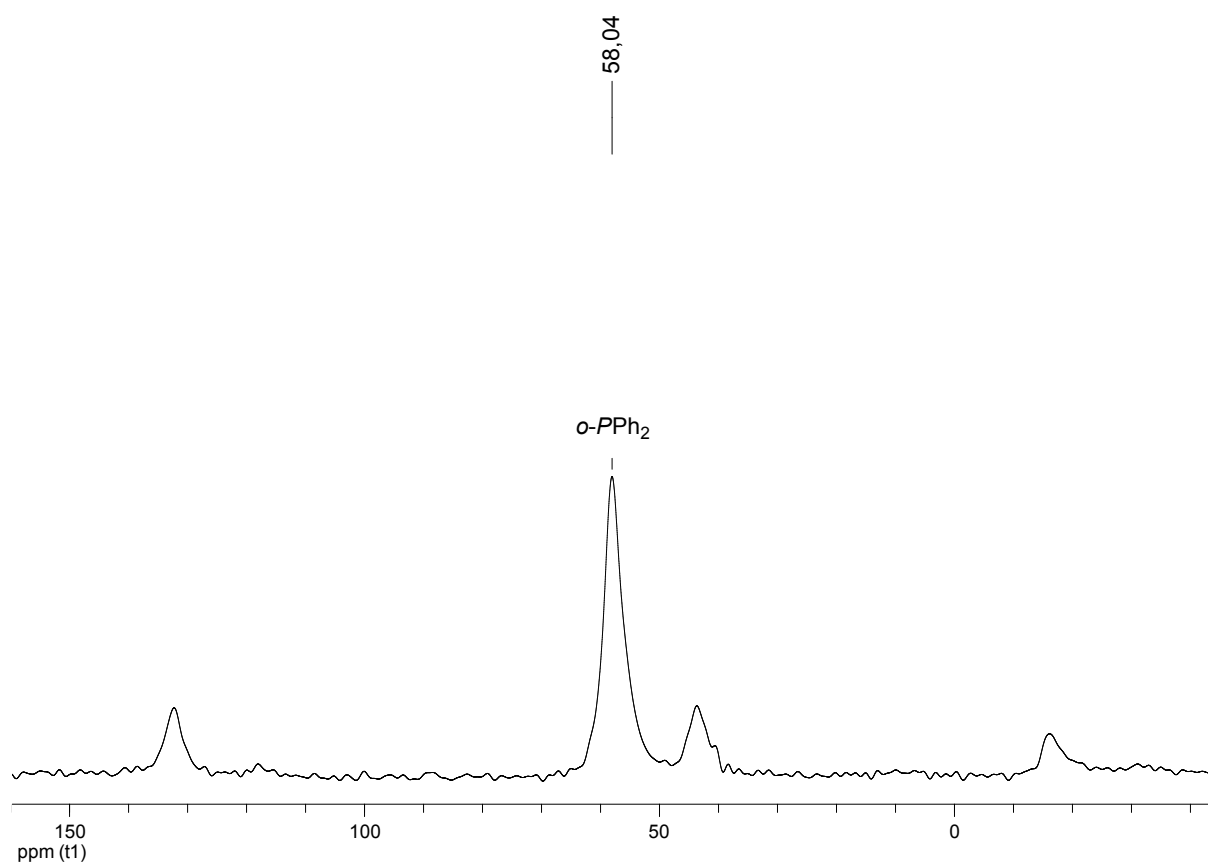

**Fig. S7** Solid state <sup>31</sup>P NMR spectrum of **3**.

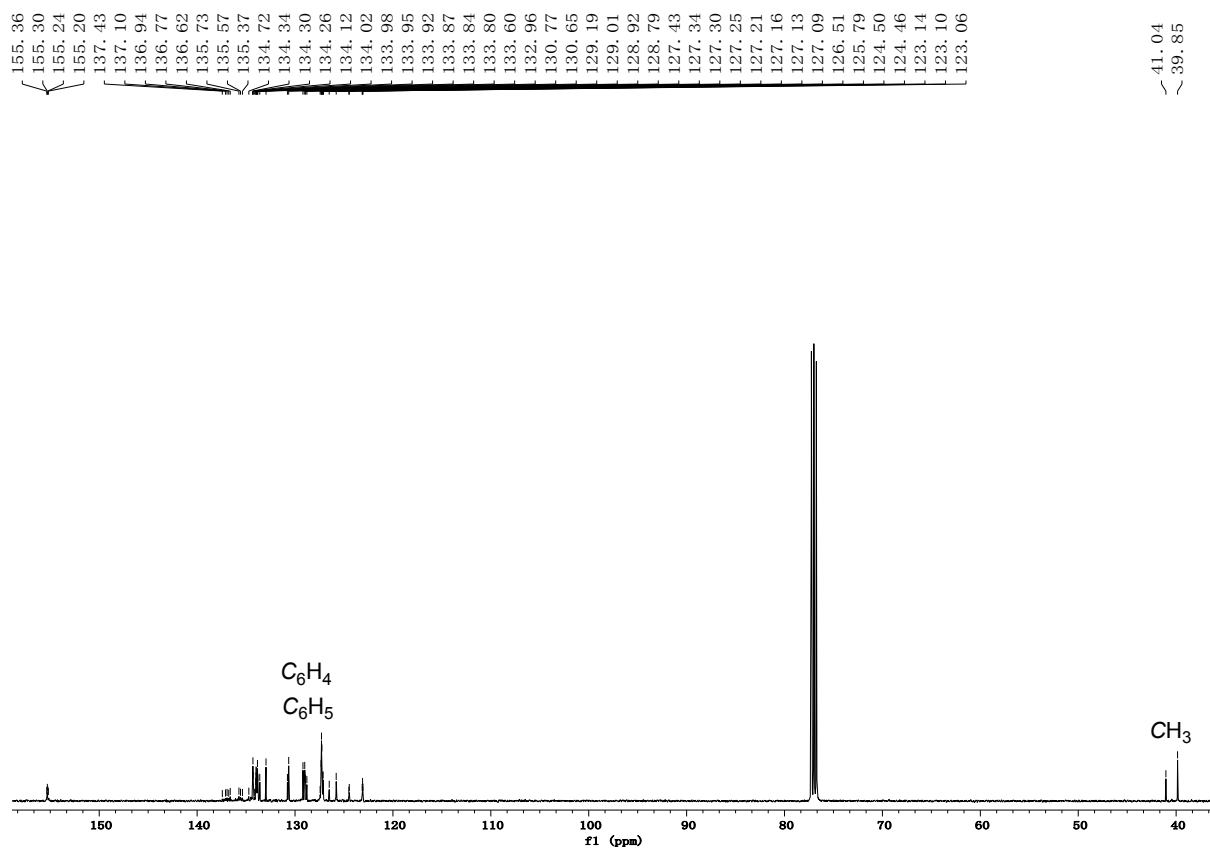

**Fig. S8** <sup>13</sup>C{<sup>1</sup>H} NMR spectrum of **3** in CDCl<sub>3</sub>.

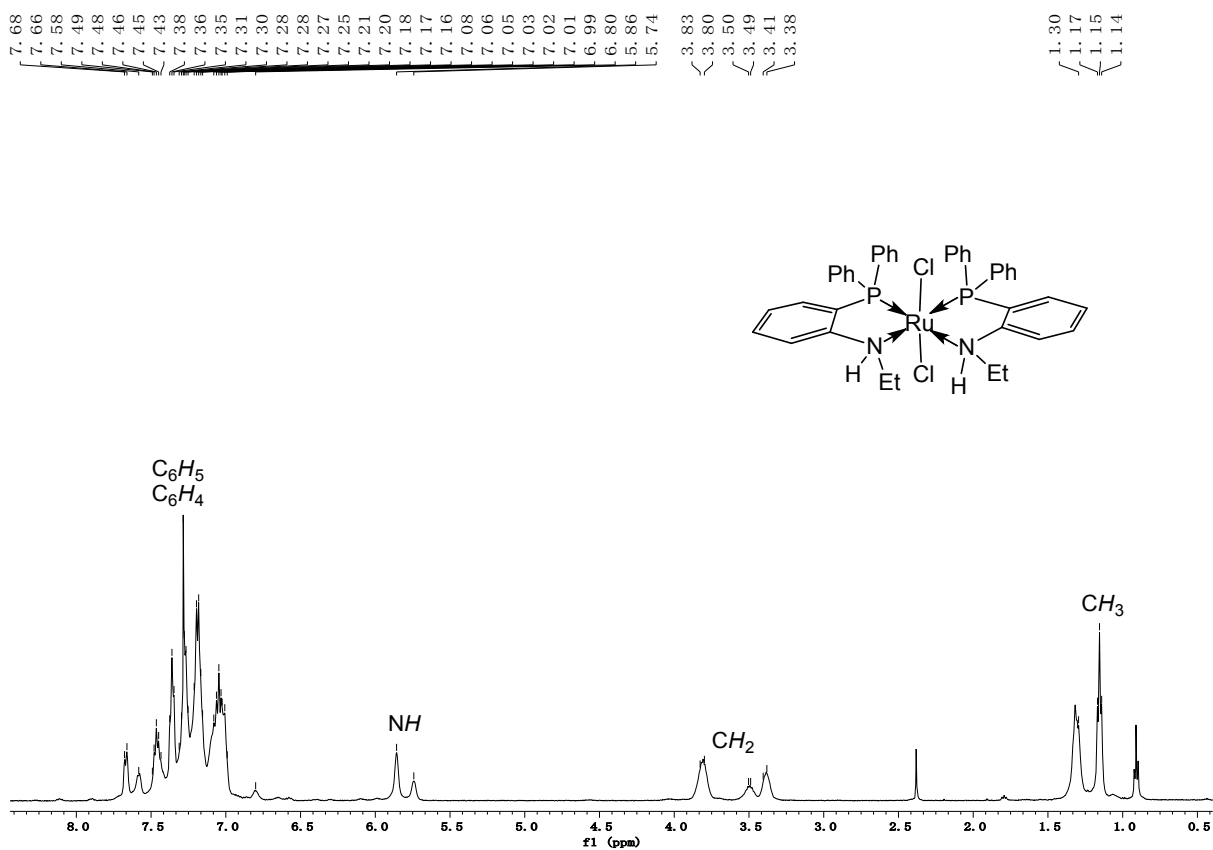

**Fig. S9**  $^1\text{H}$  NMR spectrum of **4** in  $\text{CDCl}_3$ .

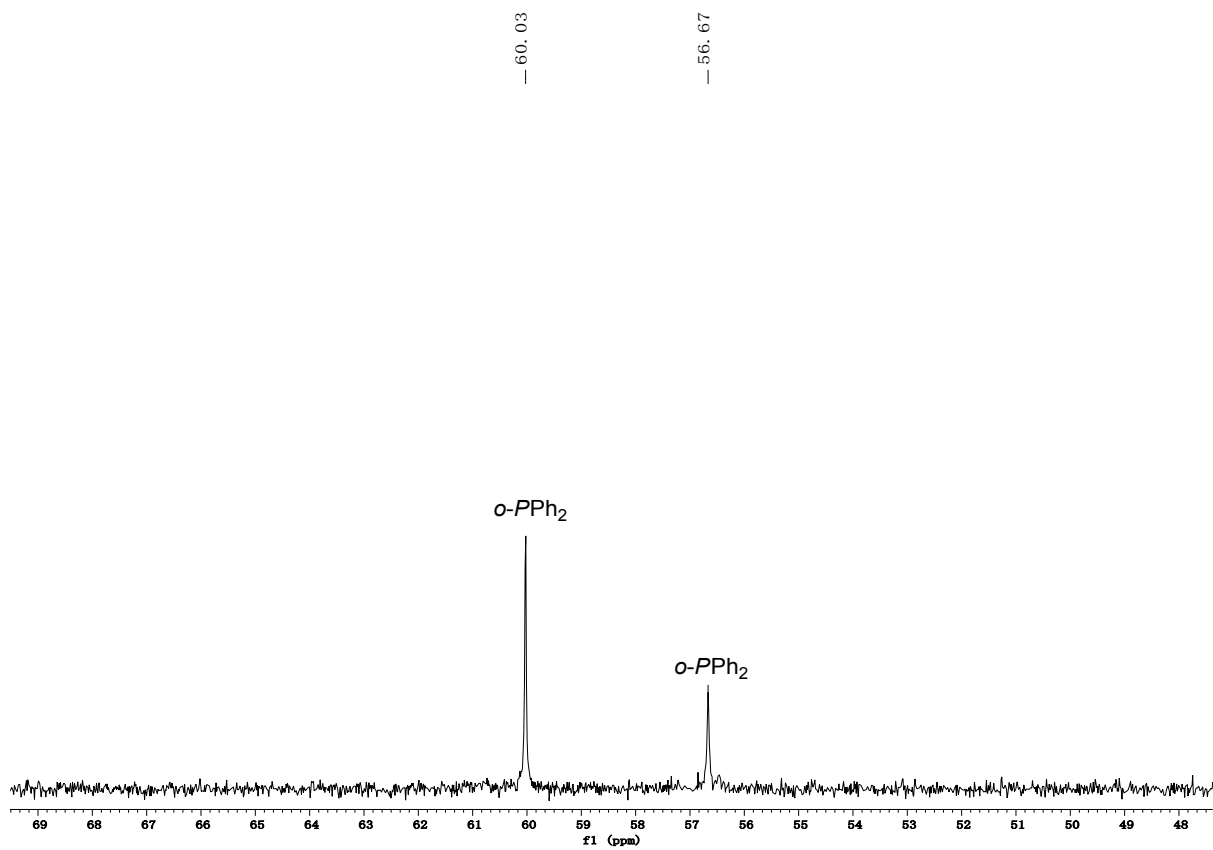

**Fig. S10**  $^{31}\text{P}\{^1\text{H}\}$  NMR spectrum of **4** in  $\text{CDCl}_3$ .

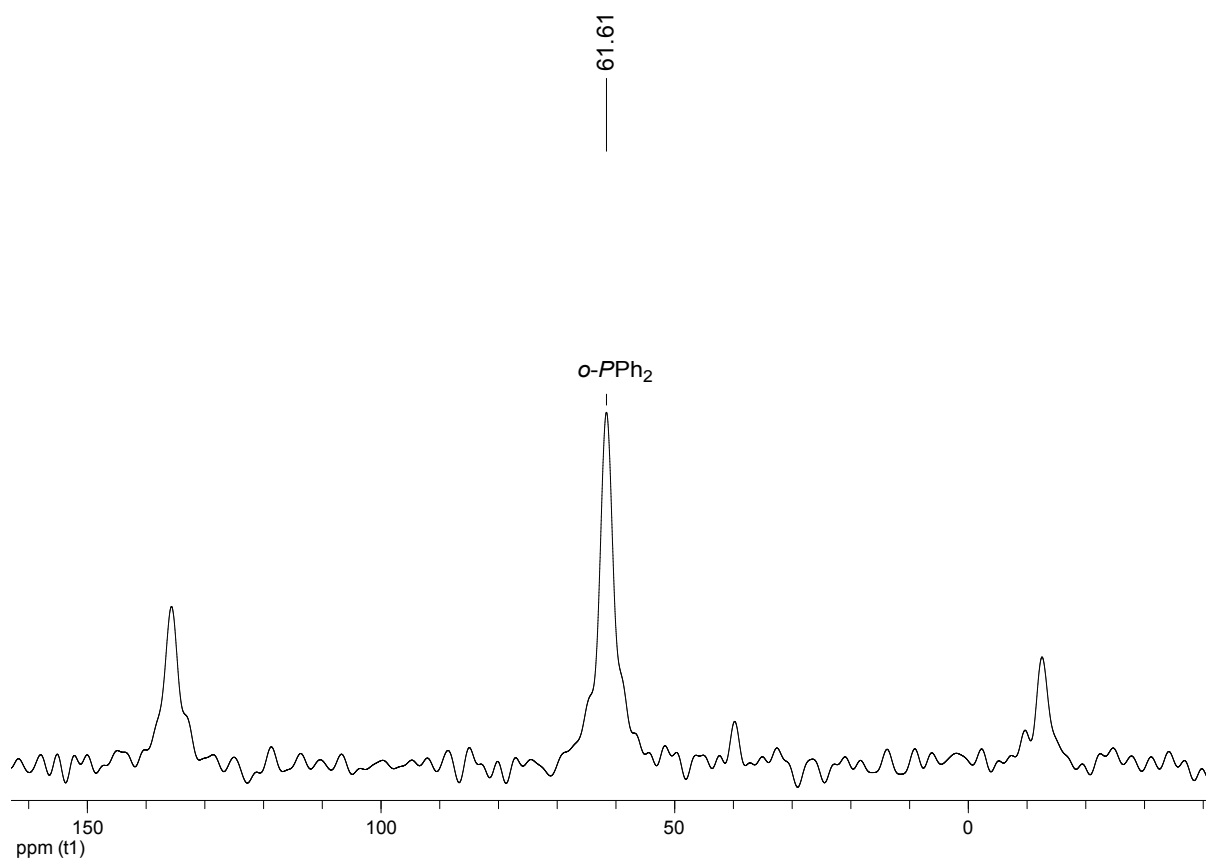

**Fig. S11** Solid state <sup>31</sup>P NMR spectrum of **4**.

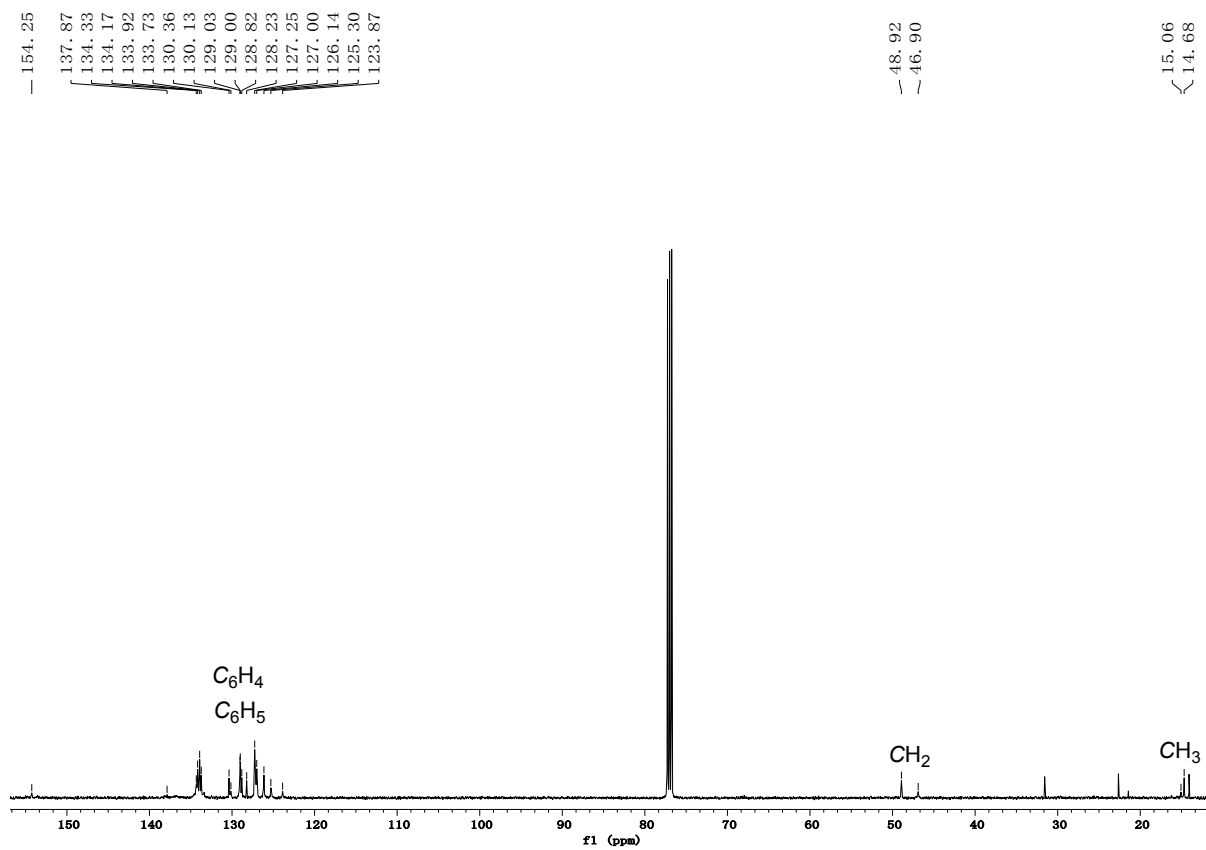

**Fig. S12** <sup>13</sup>C {<sup>1</sup>H} NMR spectrum of **4** in CDCl<sub>3</sub>.

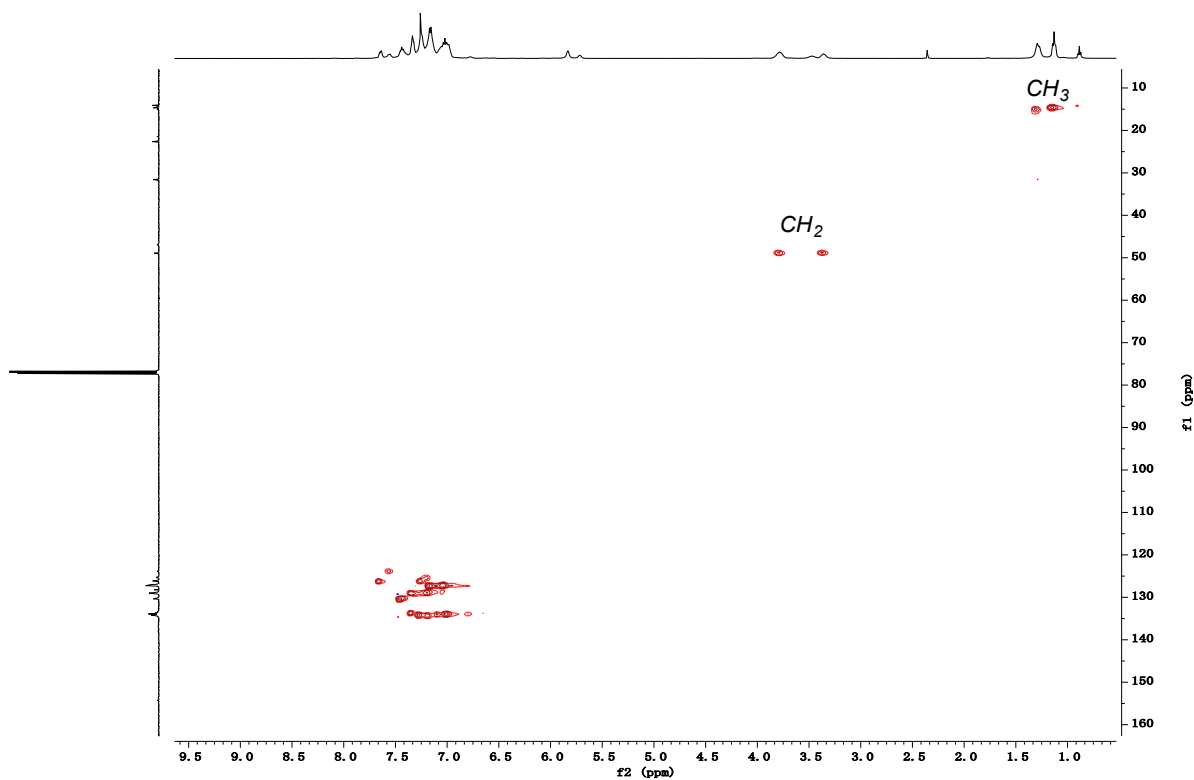

Fig. S13  $^1\text{H}$ - $^{13}\text{C}$  HSQC NMR spectrum of **4** in  $\text{CDCl}_3$ .

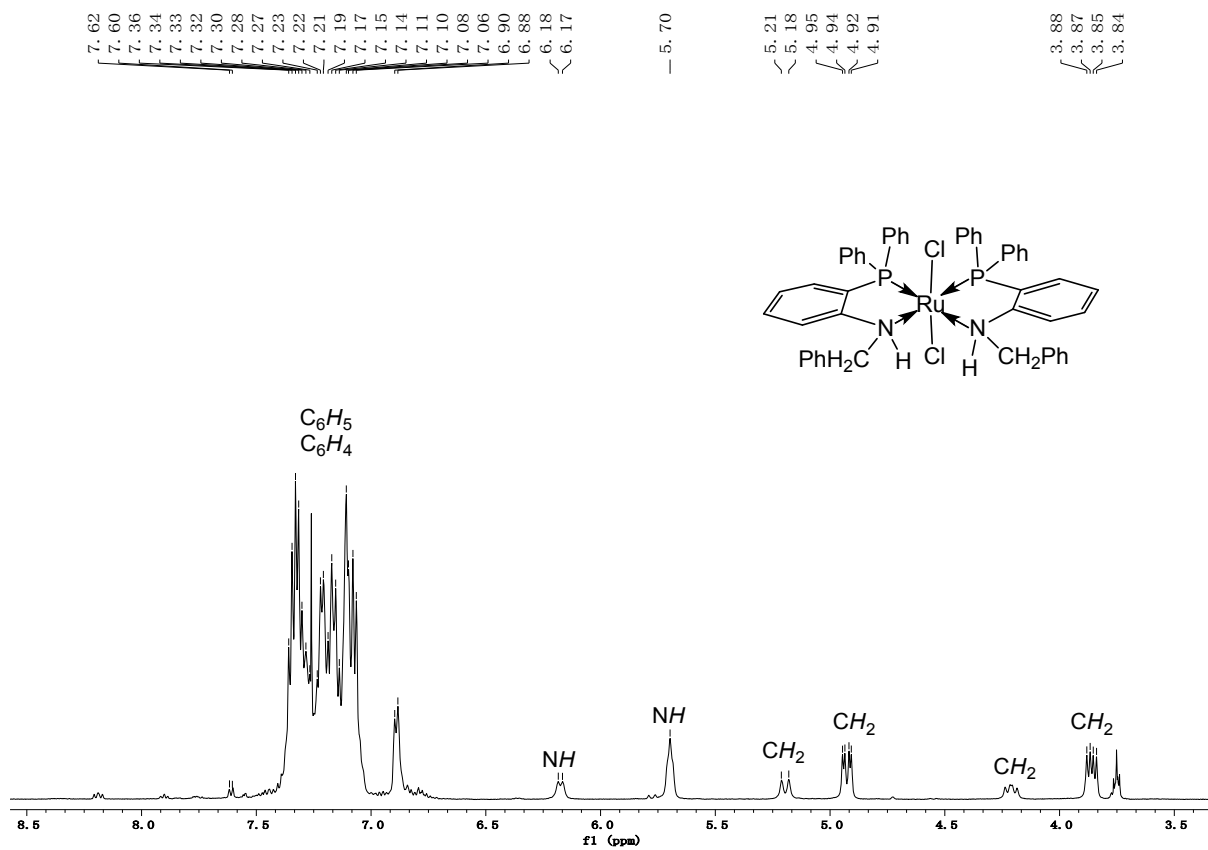

Fig. S14  $^1\text{H}$  NMR spectrum of **5** in  $\text{CDCl}_3$ .

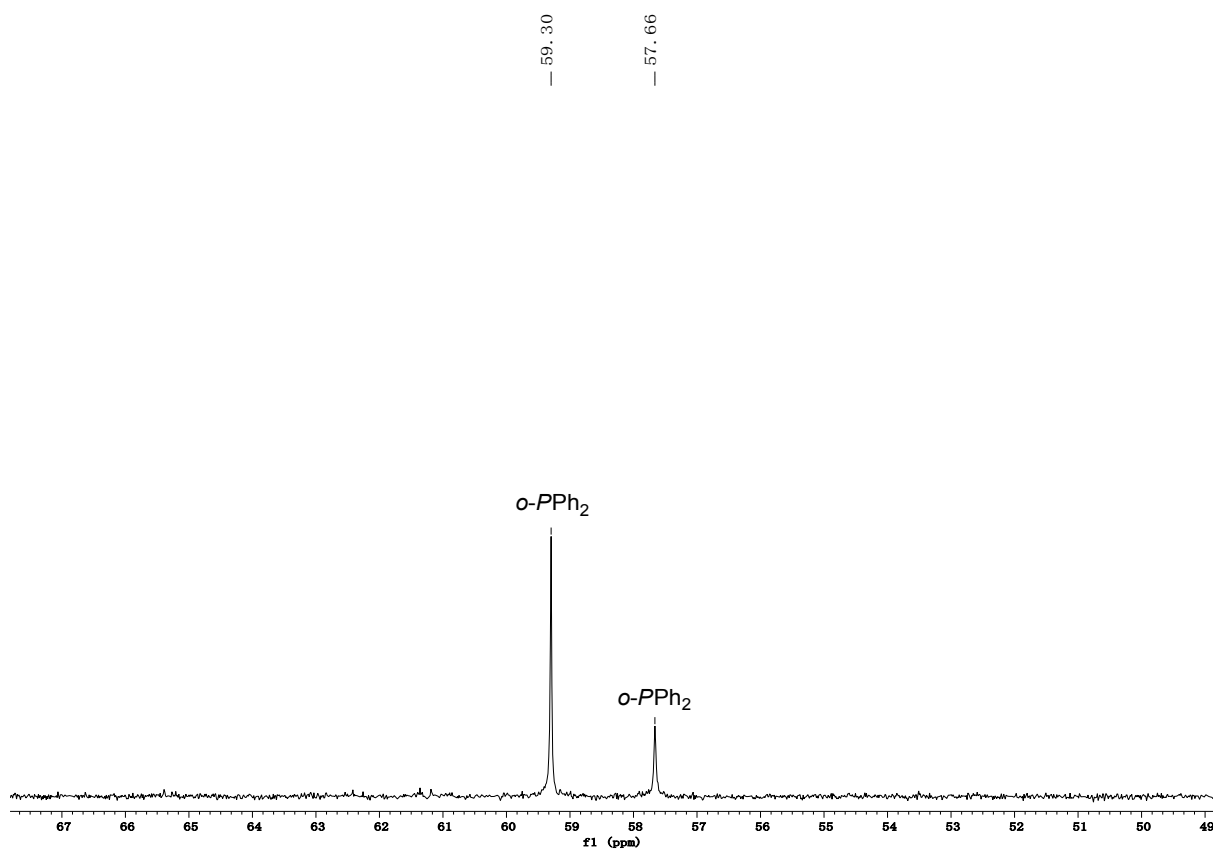

**Fig. S15**  $^{31}\text{P}\{^1\text{H}\}$  NMR spectrum of **5** in  $\text{CDCl}_3$ .

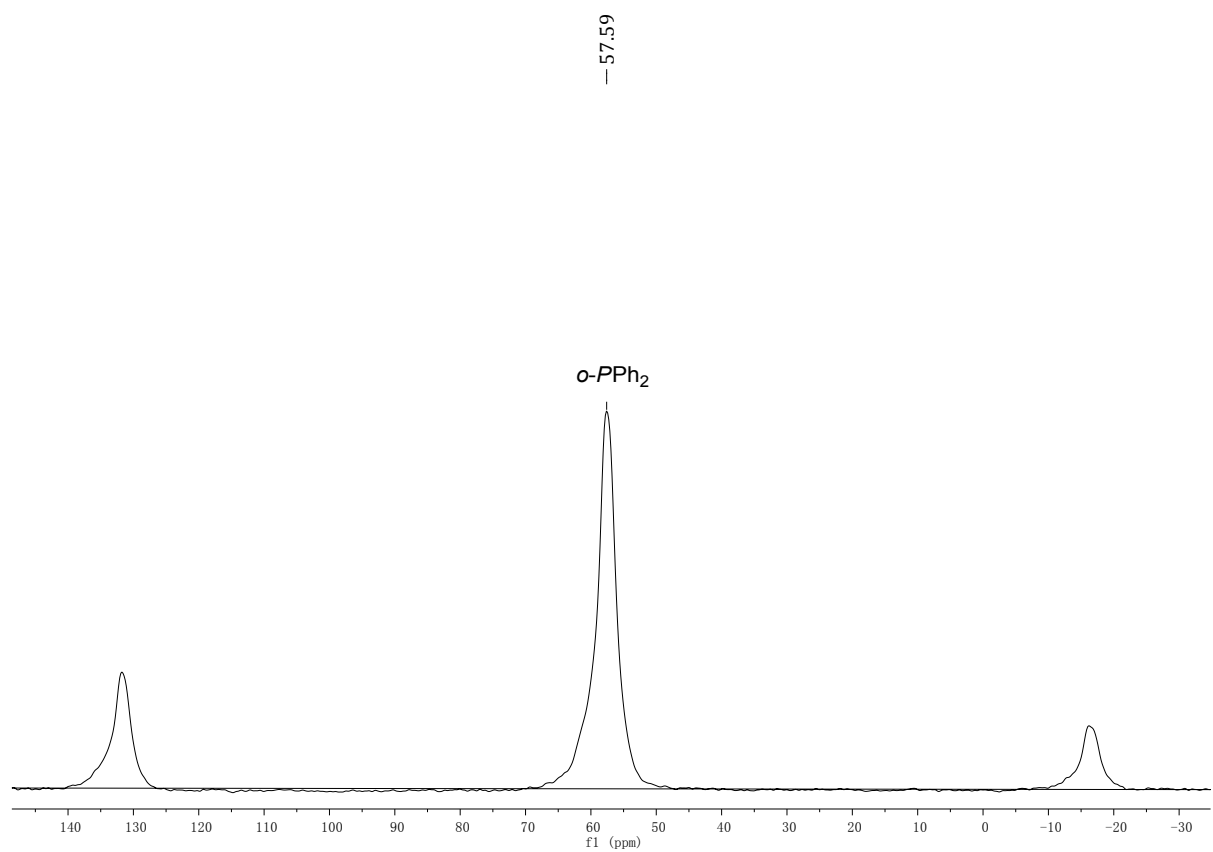

**Fig. S16** Solid state  $^{31}\text{P}$  NMR spectrum of **5**.

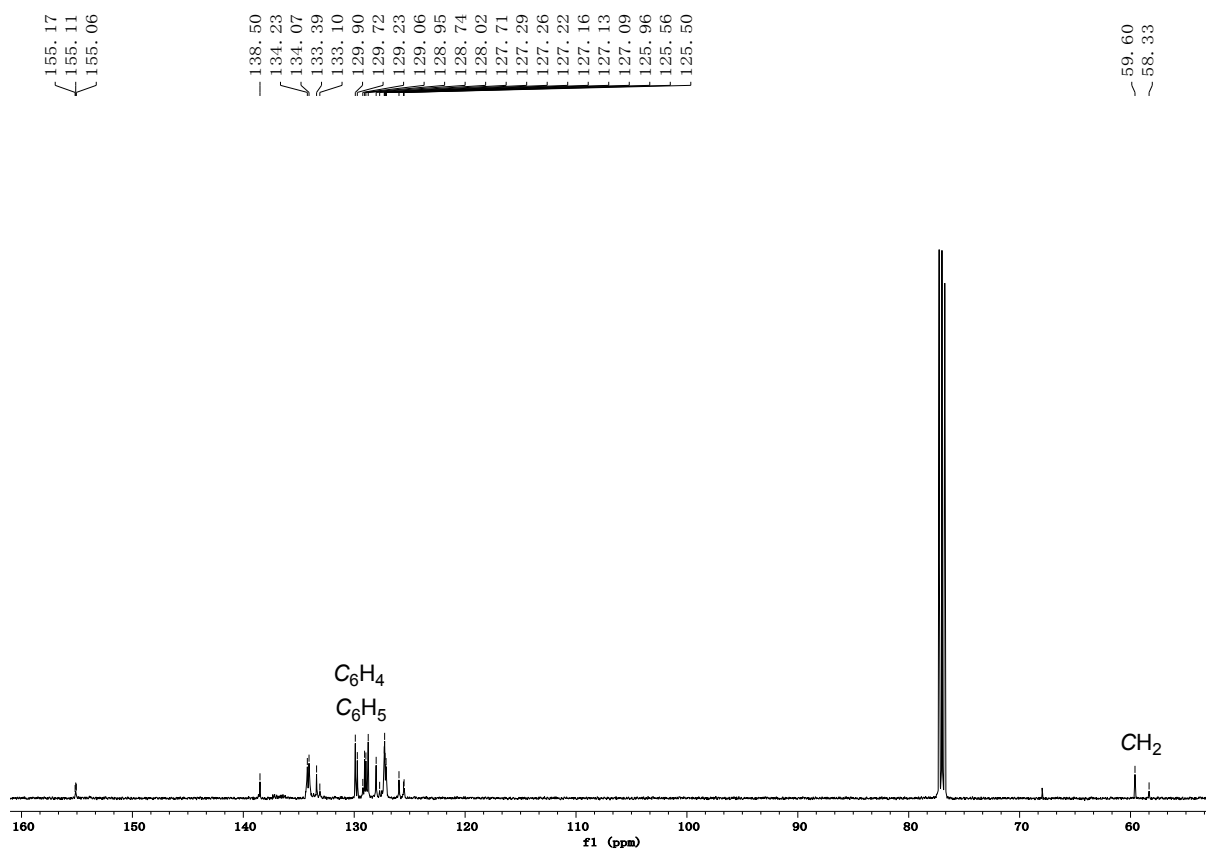

**Fig. S17**  $^{13}\text{C}\{^1\text{H}\}$  NMR spectrum of **5** in  $\text{CDCl}_3$ .

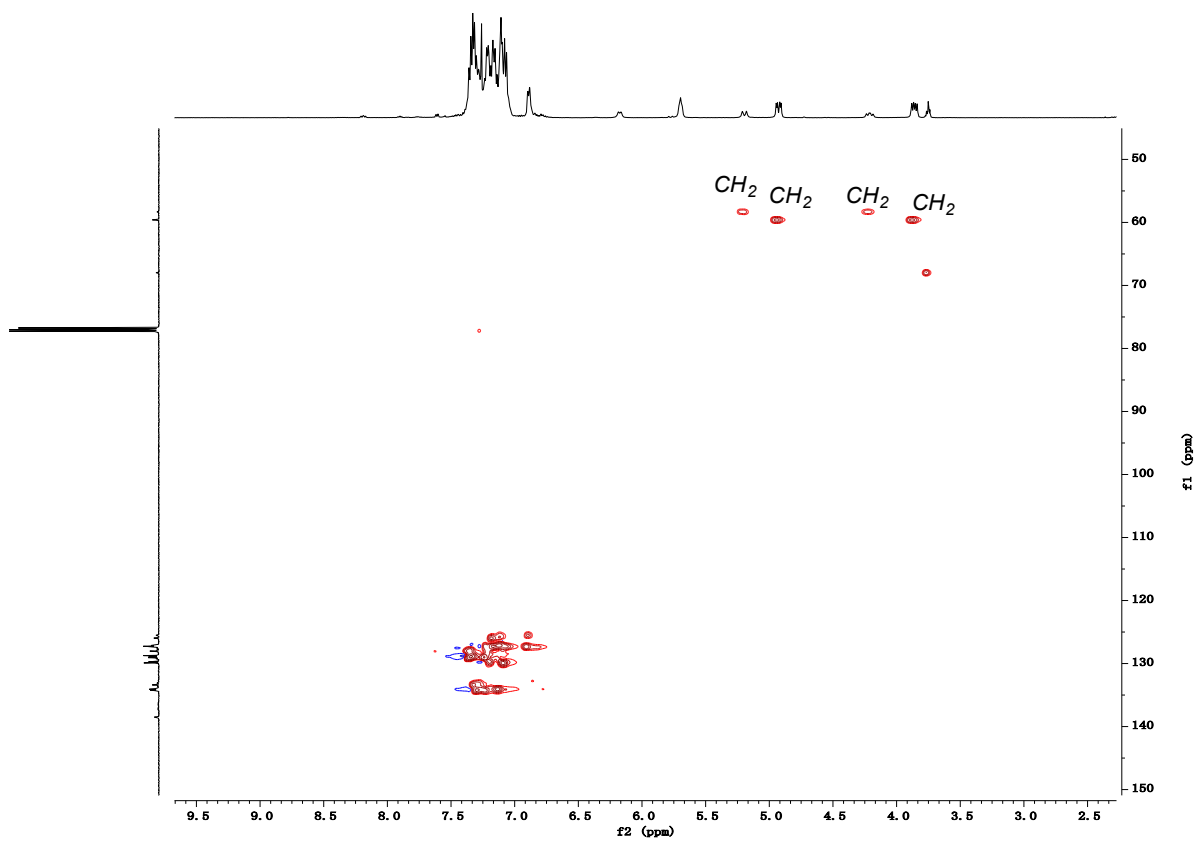

**Fig. S18**  $^1\text{H}$ - $^{13}\text{C}$  HSQC NMR spectrum of **5** in  $\text{CDCl}_3$ .



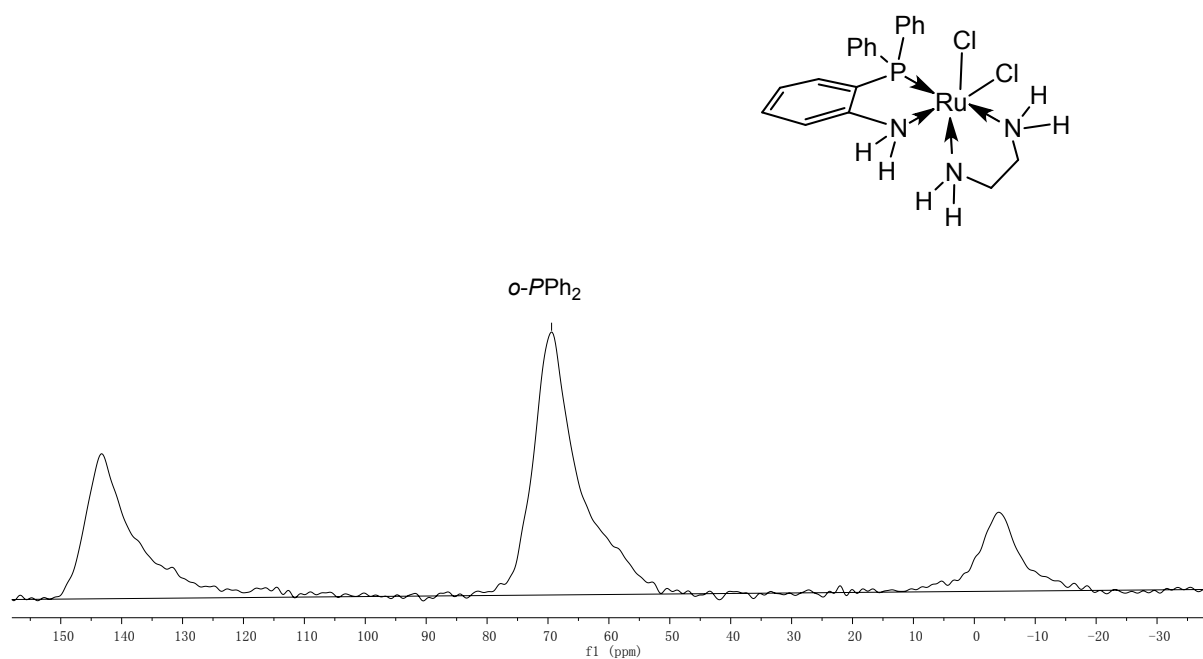

**Fig. S19** Solid state <sup>31</sup>P NMR spectrum of **6**.

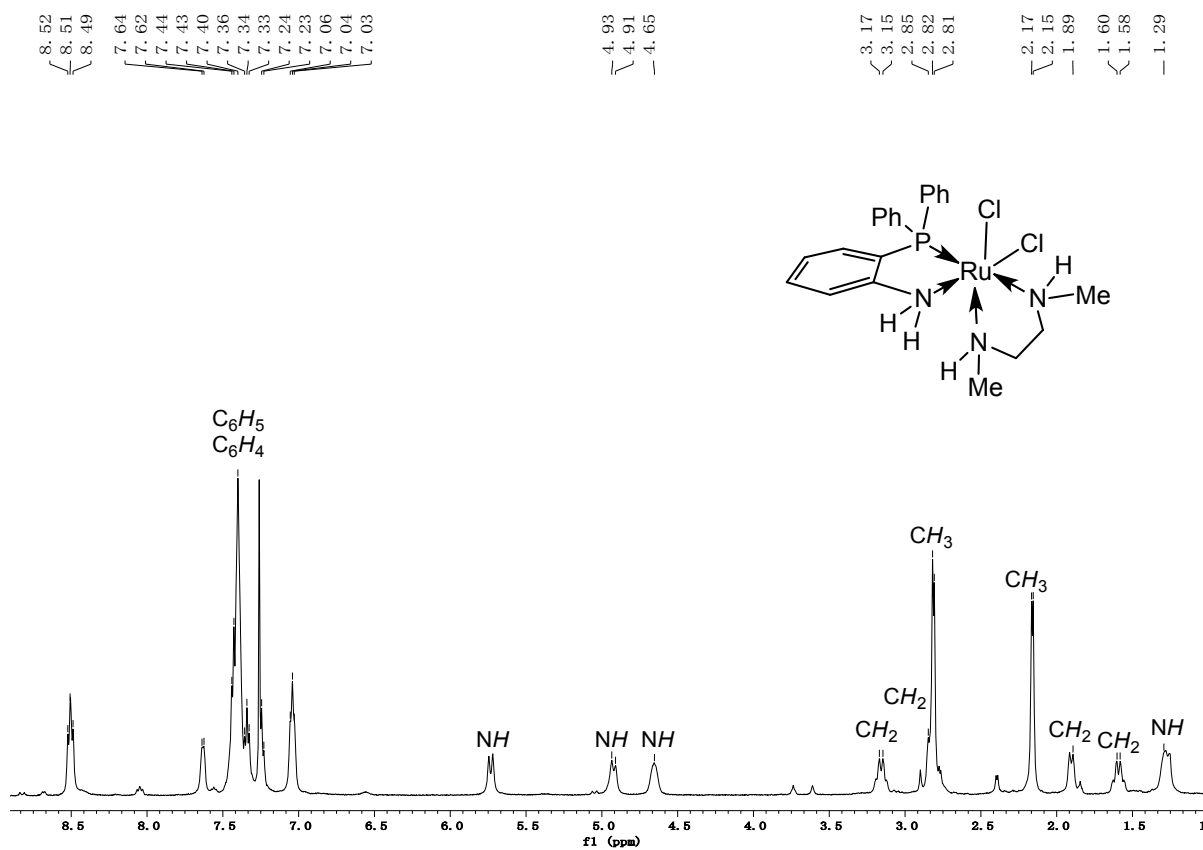

**Fig. S20** <sup>1</sup>H NMR spectrum of **7** in CDCl<sub>3</sub>.

- 71.35

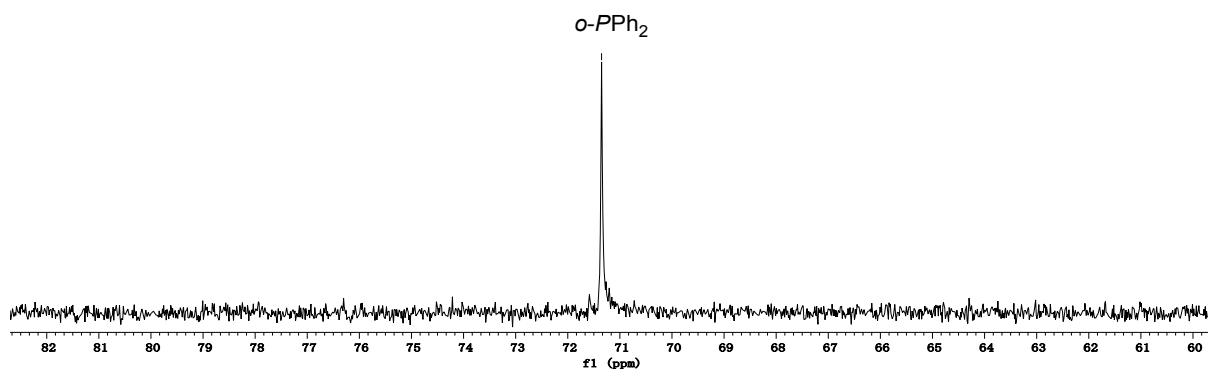

Fig. S21  $^{31}\text{P}\{^1\text{H}\}$  NMR spectrum of **7** in  $\text{CDCl}_3$ .

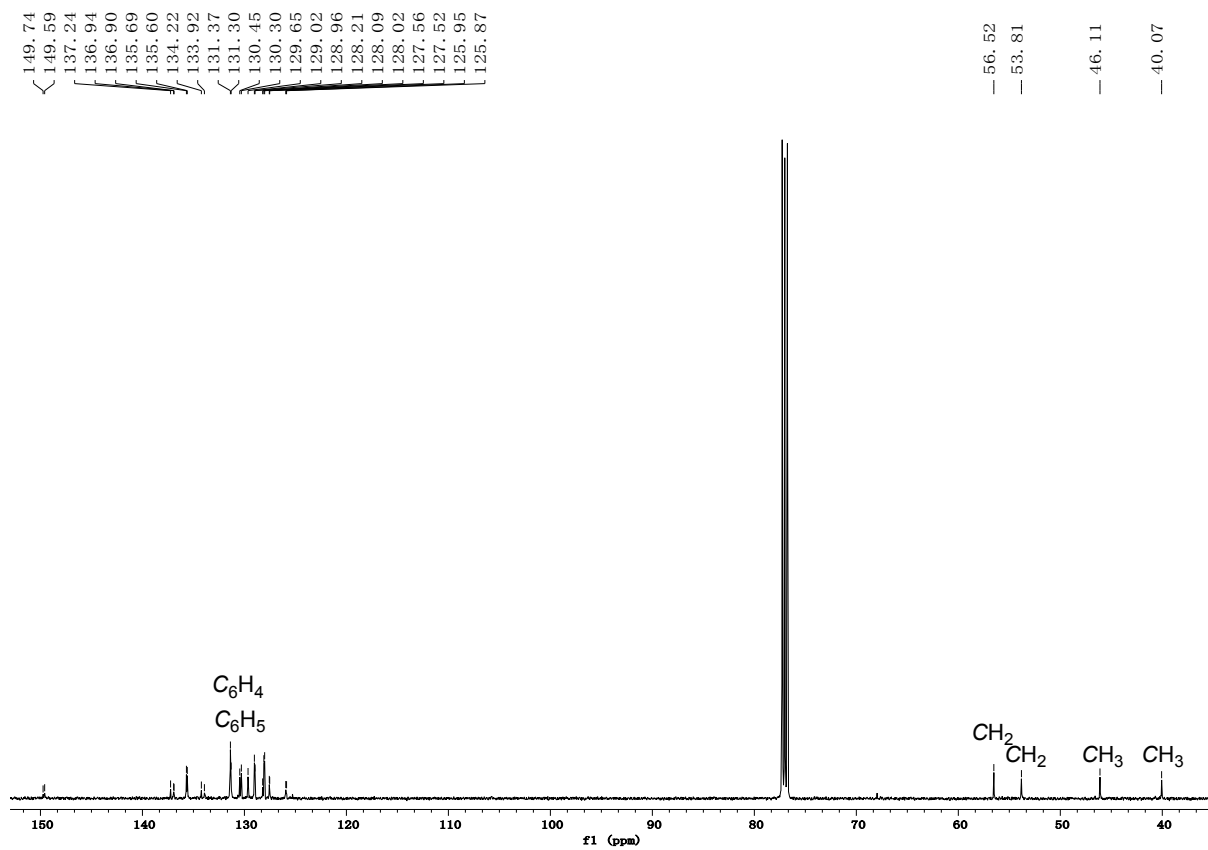

Fig. S22  $^{13}\text{C}\{^1\text{H}\}$  NMR spectrum of **7** in  $\text{CDCl}_3$ .

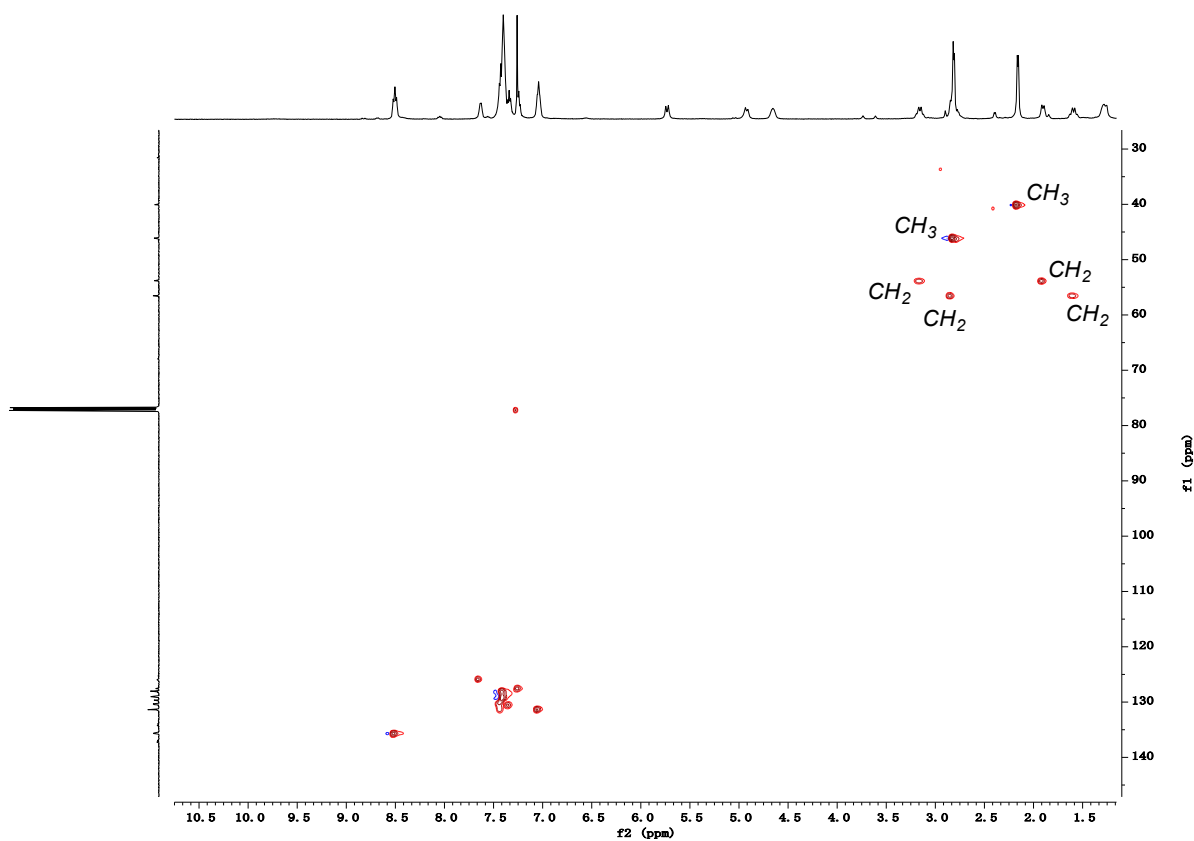

Fig. S23  $^1\text{H}$ - $^{13}\text{C}$  HSQC NMR spectrum of **7** in  $\text{CDCl}_3$ .

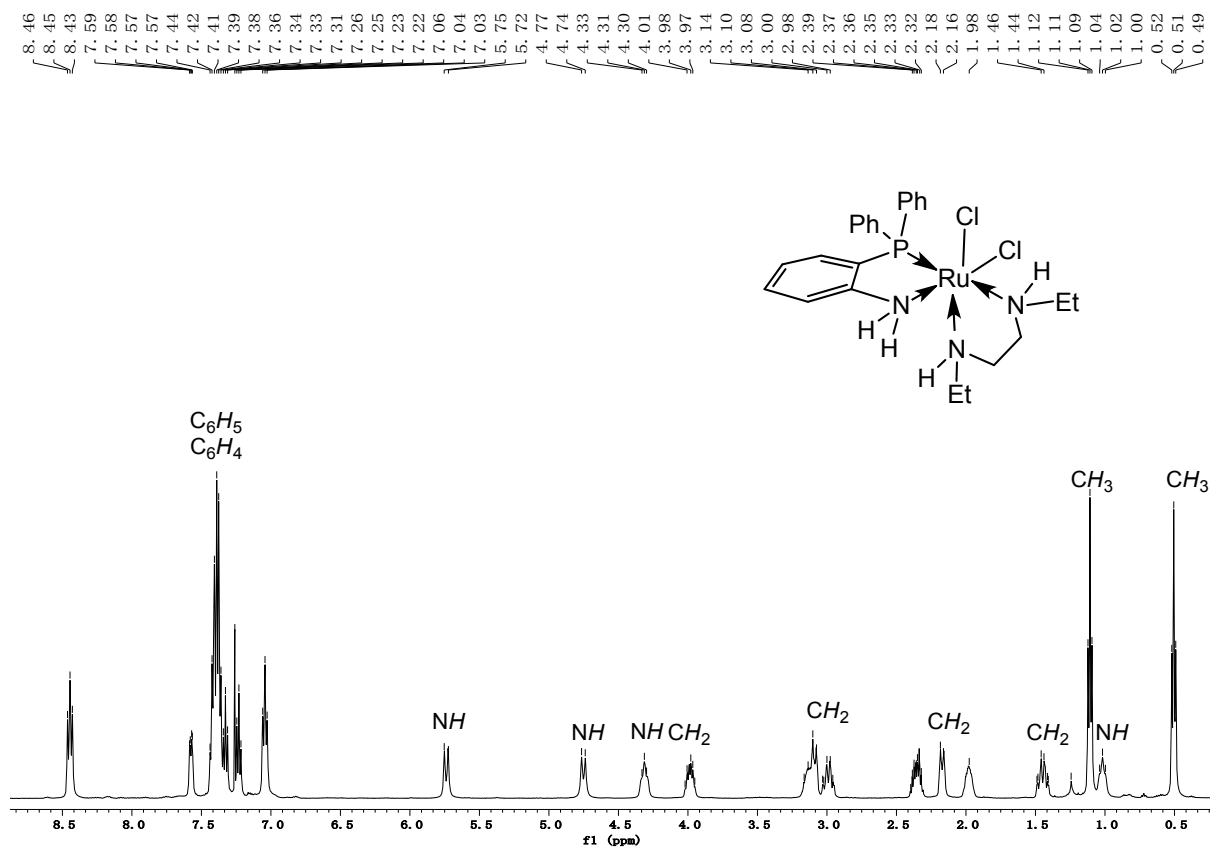

Fig. S24  $^1\text{H}$  NMR spectrum of **8** in  $\text{CDCl}_3$ .

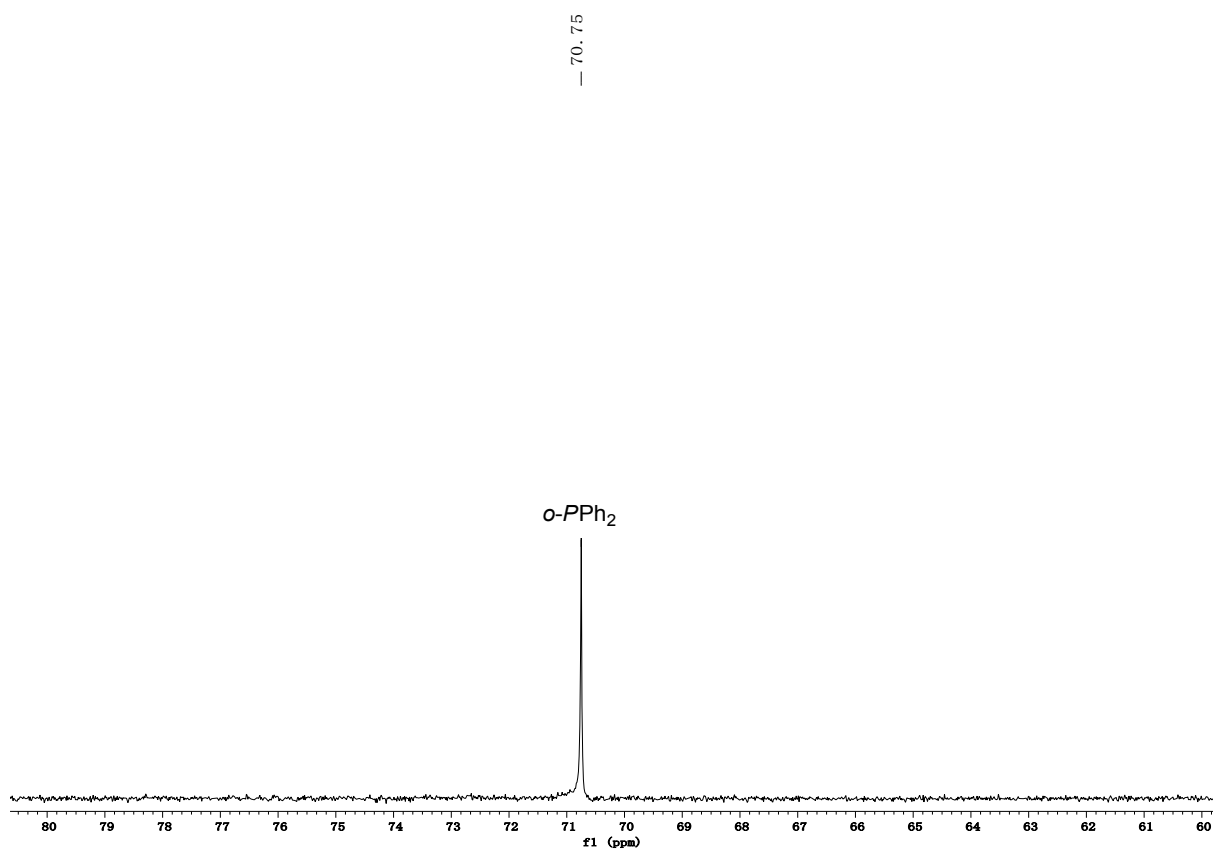

**Fig. S25**  $^{31}\text{P}\{^1\text{H}\}$  NMR spectrum of **8** in  $\text{CDCl}_3$ .

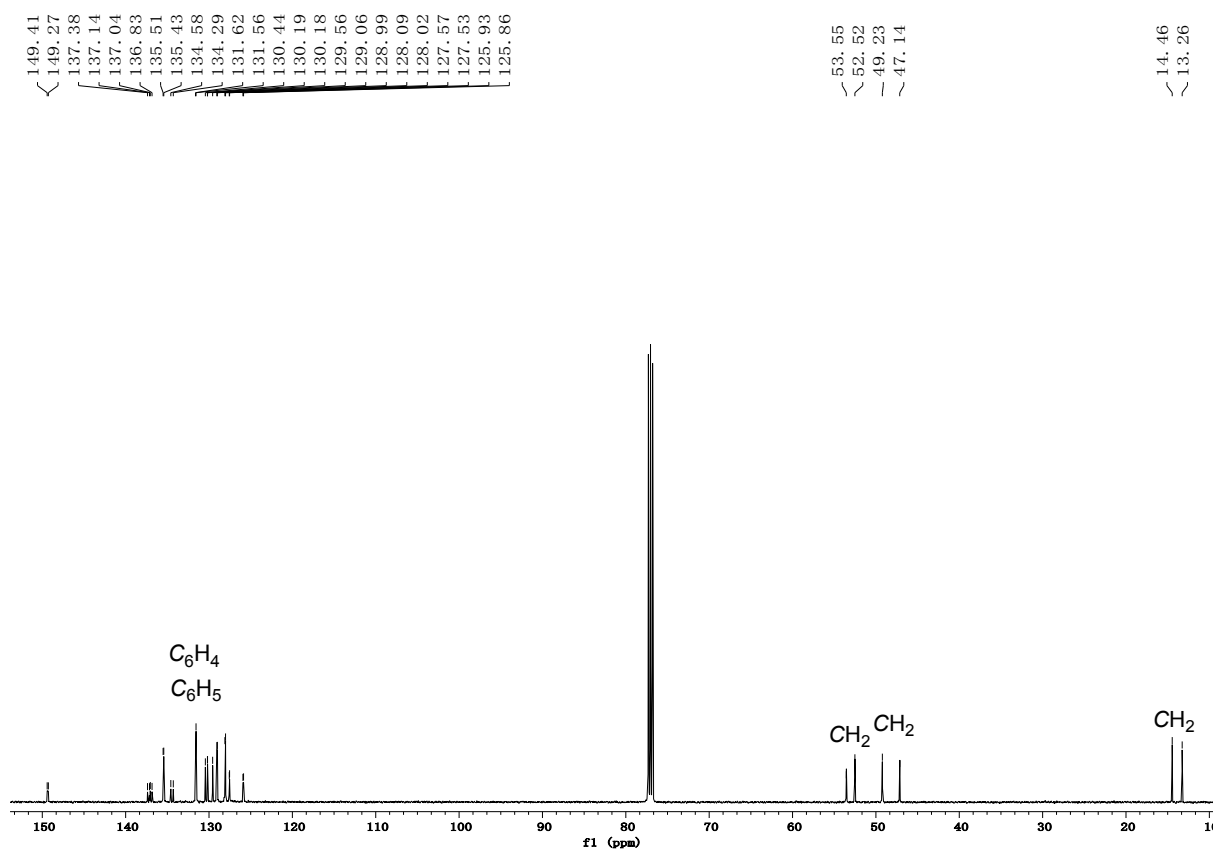

**Fig. S26**  $^{13}\text{C}\{^1\text{H}\}$  NMR spectrum of **8** in  $\text{CDCl}_3$ .

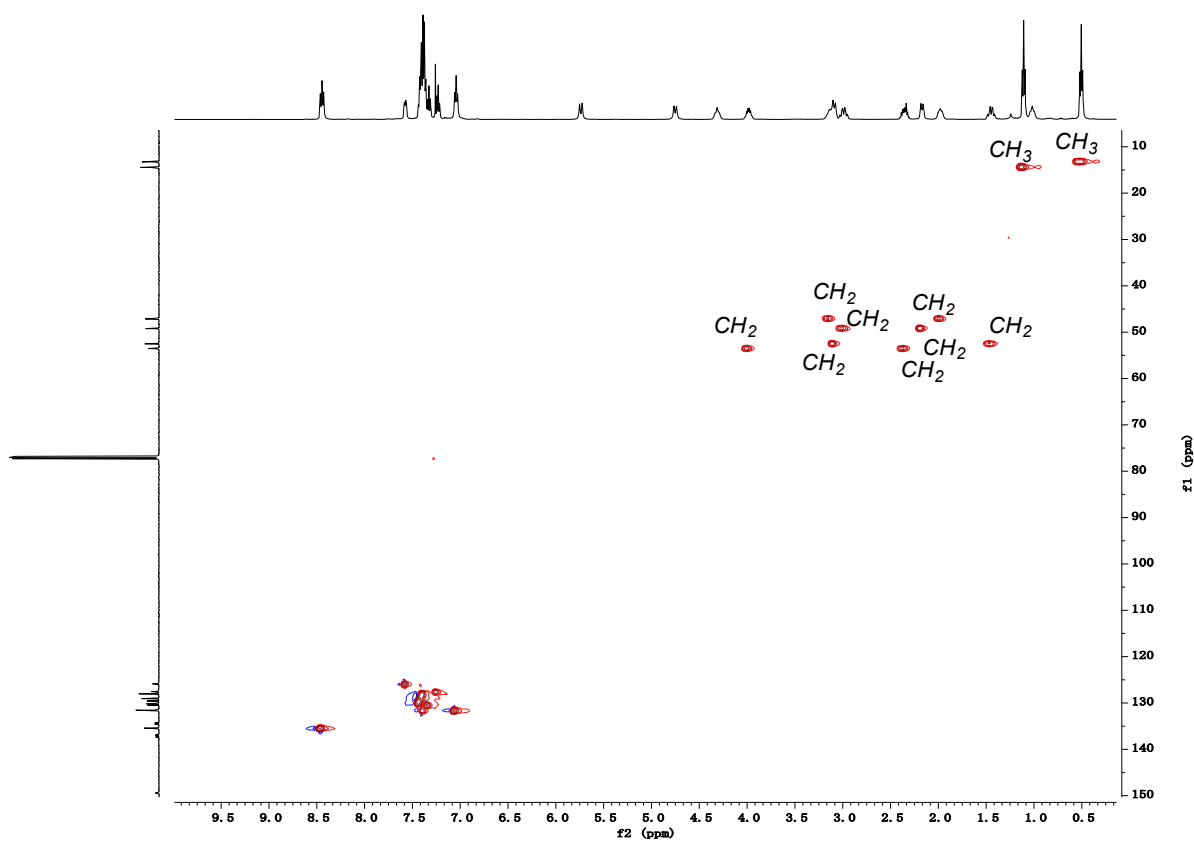

Fig. S27  $^1\text{H}$ - $^{13}\text{C}$  HSQC NMR spectrum of **8** in  $\text{CDCl}_3$ .

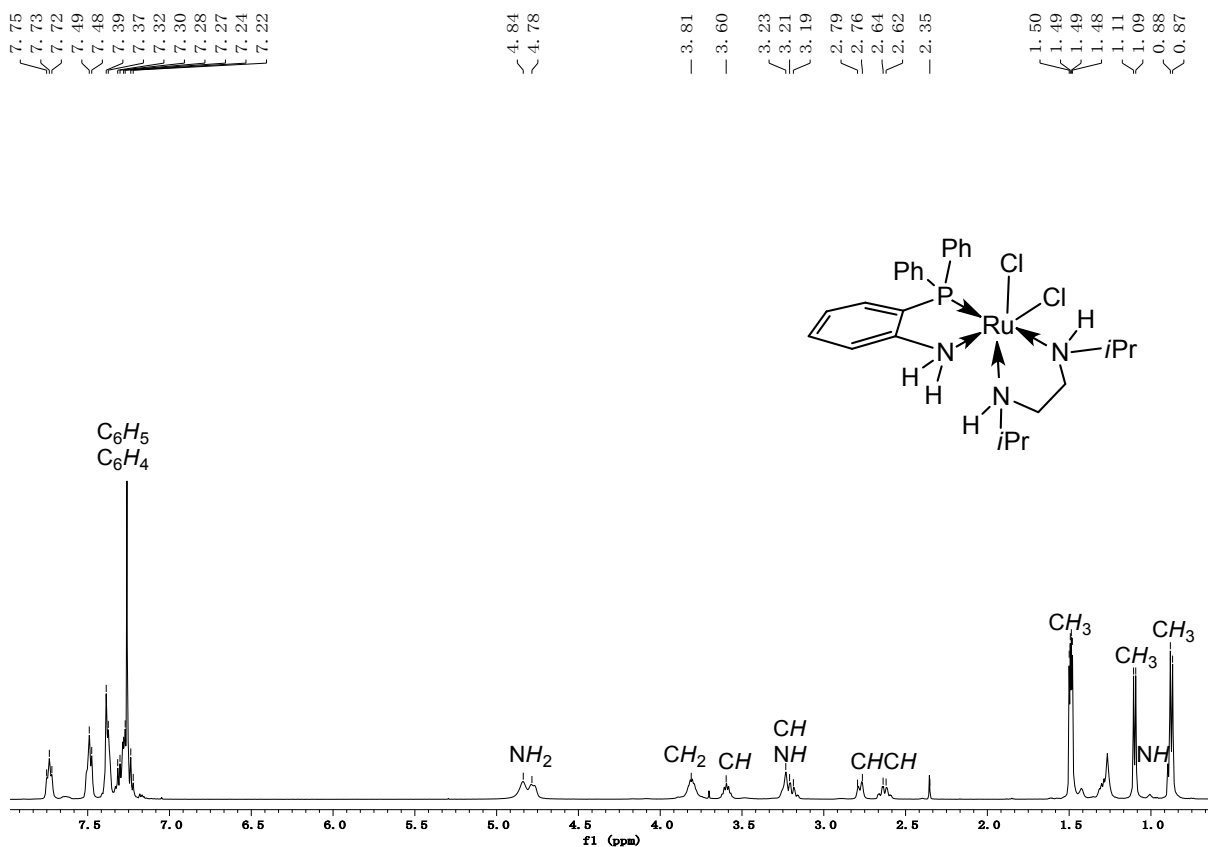

Fig. S28  $^1\text{H}$  NMR spectrum of **9** in  $\text{CDCl}_3$ .

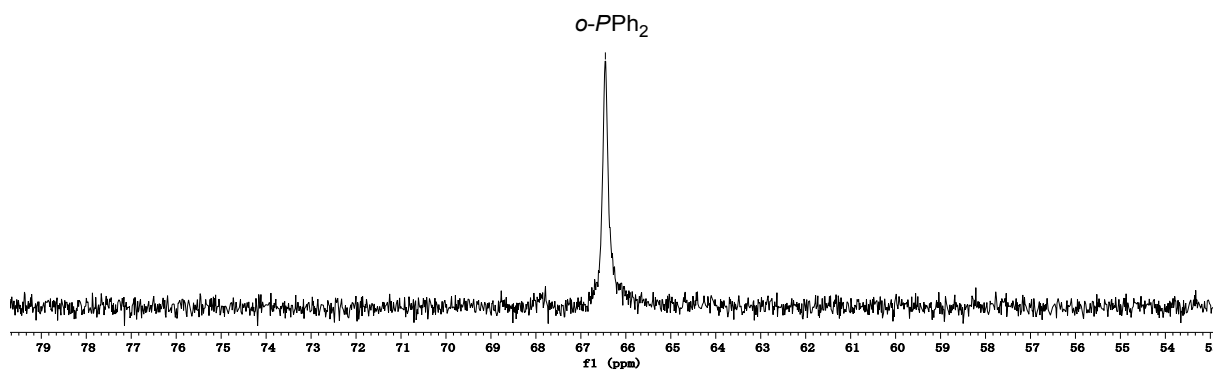

**Fig. S29** <sup>31</sup>P{<sup>1</sup>H} NMR spectrum of **9** in CDCl<sub>3</sub>.

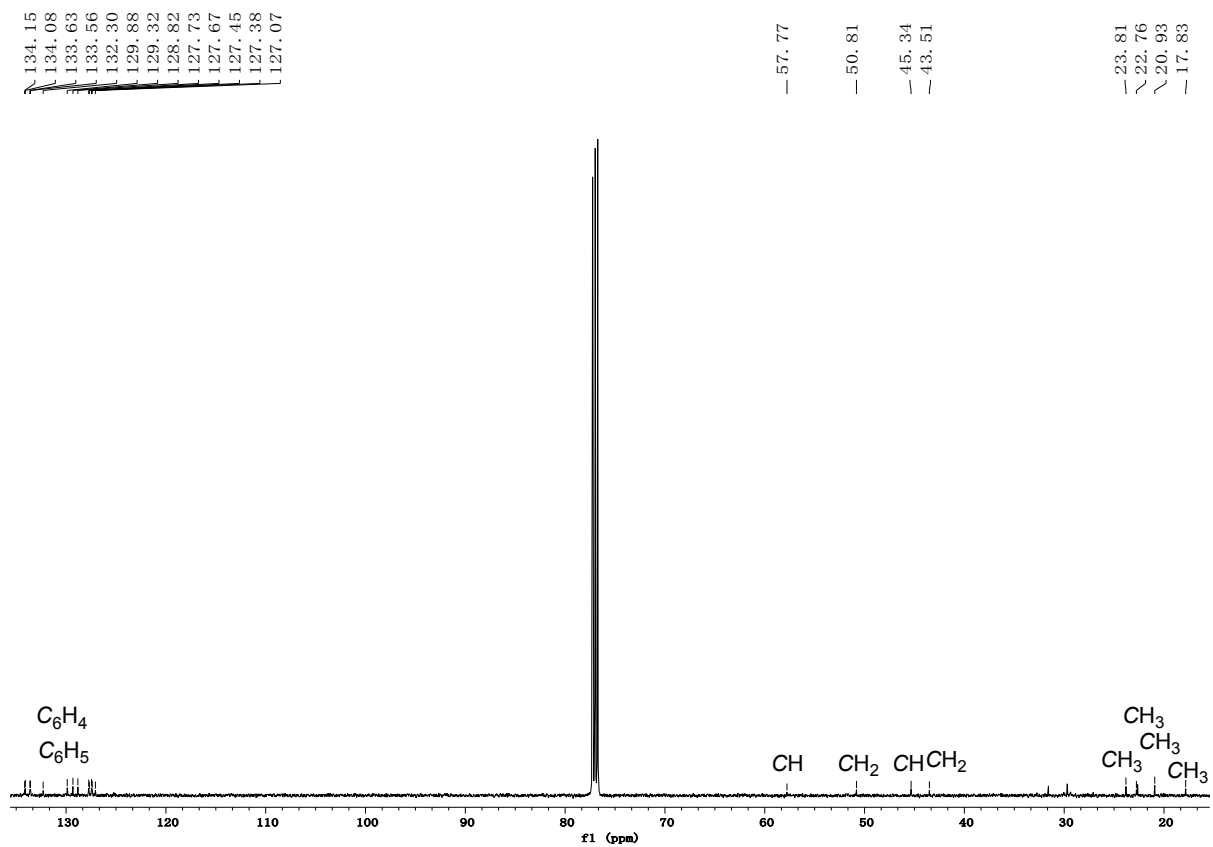

**Fig. S30** <sup>13</sup>C{<sup>1</sup>H} NMR spectrum of **9** in CDCl<sub>3</sub>.

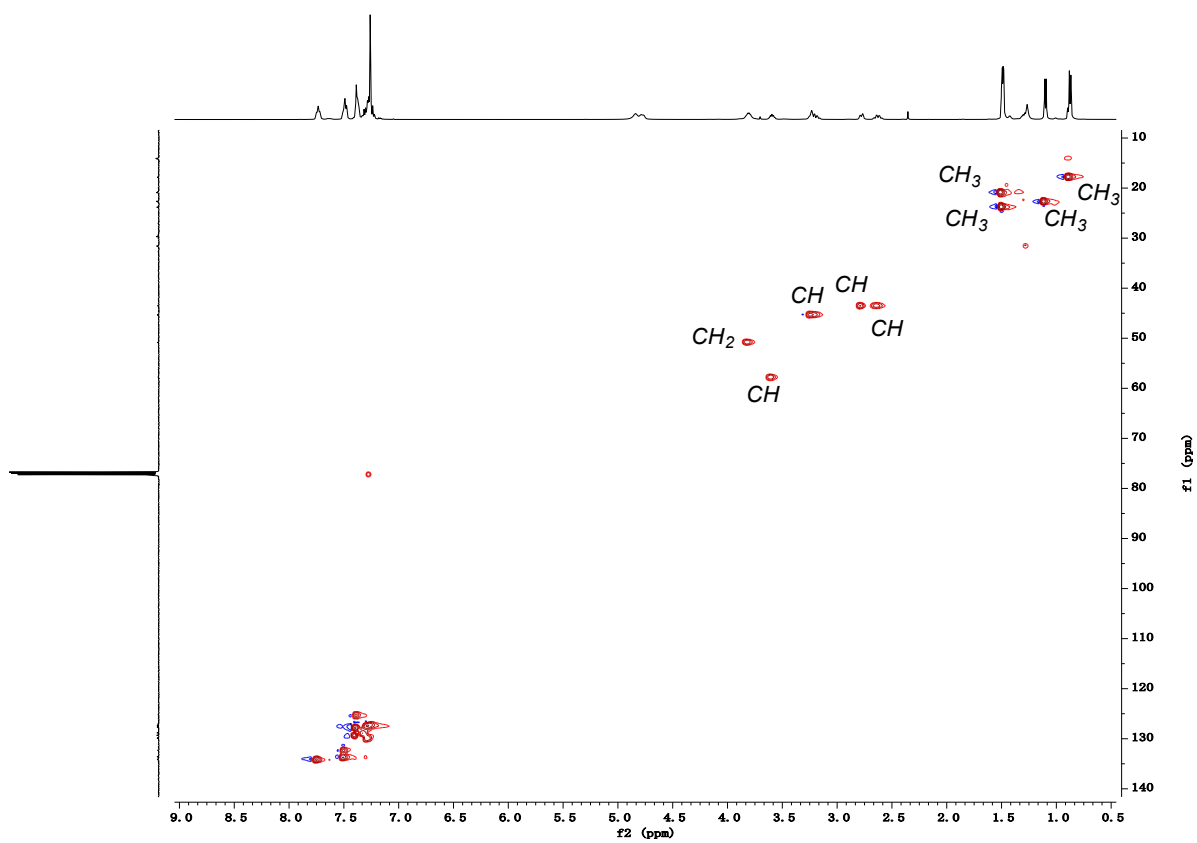

**Fig. S31**  $^1\text{H}$ - $^{13}\text{C}$  HSQC NMR spectrum of **9** in  $\text{CDCl}_3$ .

## VII. References

- [1] Herd, A. Heßler, M. Hingst, M. Tepper and O. Stelzer, *J. Organomet. Chem.* 1996, **522**, 69-76.
- [2] H. Y. Wang and G. X. Jin, *Eur. J. Inorg. Chem.* 2005, **2005**, 1665-1670.
- [3] F. Ossola, F. Tisato and F. Refosco, *Inorg. Chim. Acta* 2002, **330**, 17-24.
- [4] D. Wang, S. Li, X. Liu, W. Gao and D. Cui, *Organometallics* 2008, **27**, 6531-6538.
- [5] S. J. La Placa and J. A. Ibers, *Inorg. Chem.* 1965, **4**, 778-783.
- [6] G. M. Sheldrick, SHELXS-90, Program for structure solution. *Acta Crystallogr. Sect. A* 1990, **46**, 467-473.
- [7] G. M. Sheldrick, SHELXL-97, Program for crystal structure refinement. University of Göttingen: Göttingen, Germany, 1997.
